# Supplementary material for: β-Borylation of conjugated carbonyl compounds with silylborane or bis(pinacolato)diboron catalyzed by Au nanoparticles
Source: Royal Society of Chemistry journal article supplement (doi:10.1039/d0ob01806f), 2020-01-01
Supplement: d0ob01806f1.pdf [file d0ob01806f1.pdf]

## SUPPORTING INFORMATION

### **$\beta$ -Borylation of Conjugated Carbonyl Compounds by Silylborane or Bis(pinacolato)diboron Catalyzed by Au Nanoparticles**

Marios Kidonakis\*, Michael Fragkiadakis and Manolis Stratakis\*

*Department of Chemistry, University of Crete, Voutes 71003 Heraklion, Greece*

[stratakis@uoc.gr](mailto:stratakis@uoc.gr); [makidonakis@uoc.gr](mailto:makidonakis@uoc.gr)

#### **Table of contents**

|        |                                                                                                            |
|--------|------------------------------------------------------------------------------------------------------------|
| S2-S4  | Substrates used in these studies                                                                           |
| S5-S36 | Copies of $^1\text{H}$ , $^{13}\text{C}$ NMR and selected MS spectra of synthesized reactants and products |

### Conjugated carbonyl compounds used in this studies

Below is the list of conjugated carbonyl compounds that were used in this study:

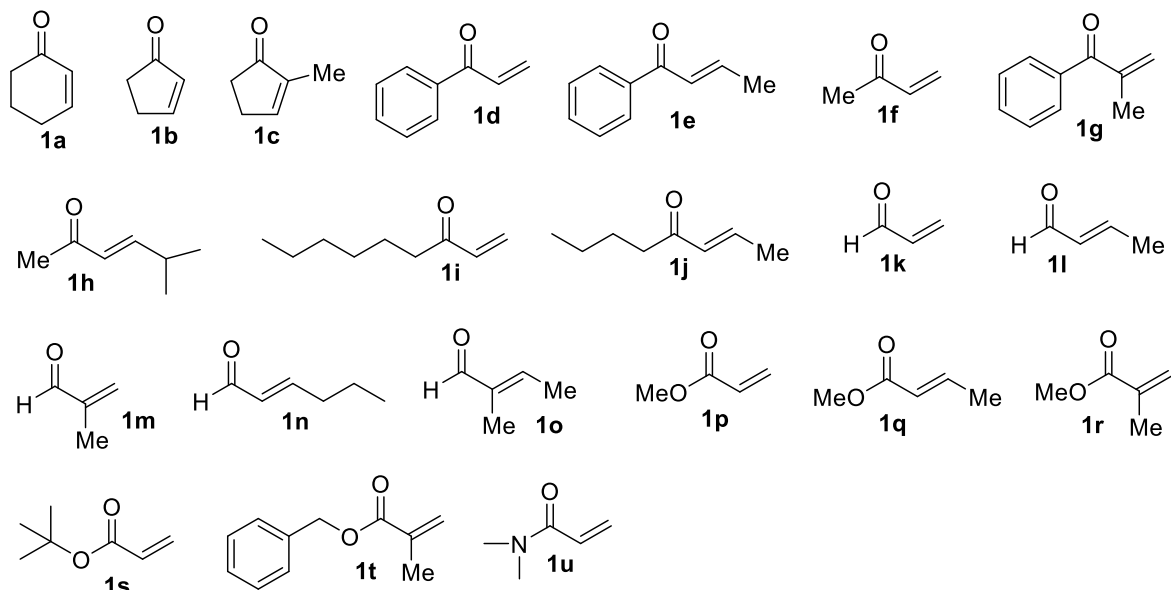

Among them, **1a-1c**, **1e-1f**, **1h**, and **1k-1u** are commercially available. Enones **1d**<sup>1</sup> and **1g**<sup>2</sup> were prepared from the reaction of the phosphorus stabilized ylides shown below with excess of paraformaldehyde in DCM.

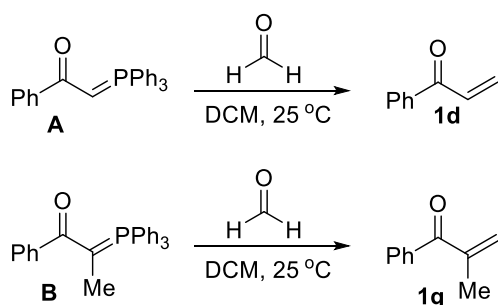

To a round bottom flask were added 1 mmol of the stabilized phosphorus ylide **A** in 5 mL DCM followed by 3 mmol of paraphormaldehyde. The reaction was stirred for 12 h at room temperature. Then hexane was added for the precipitation of  $\text{Ph}_3\text{PO}$ , and enone **1d** was isolated after column chromatography (n-Hexane/EtOAc: 40/1) as a yellow oil (69% isolated yield). Enone **1g** was prepared similarly using the stabilized phosphorus ylide **B** in 66% isolated yield.

<sup>1</sup>H NMR of **1d** ( $\text{CDCl}_3$ , 500 MHz): 7.95 (m, 2H), 7.58 (t,  $J = 7.5$  Hz, 1H), 7.48 (t,  $J = 7.5$  Hz, 2H), 7.16 (dd,  $J_1 = 17.0$  Hz,  $J_2 = 10.5$  Hz, 1H), 6.45 (dd,  $J_1 = 17.0$  Hz,  $J_2 = 2.0$  Hz, 1H), 5.94 (dd,  $J_1 = 10.5$  Hz,  $J_2 = 2.0$  Hz, 1H).

<sup>13</sup>C NMR (125 MHz,  $\text{CDCl}_3$ ): 191.1, 137.2, 133.0, 132.3, 130.2, 128.7, 128.6, 128.6.

$^1\text{H}$  NMR of **1g** ( $\text{CDCl}_3$ , 500 MHz): 7.73 (m, 2H), 7.53 (t,  $J = 7.5$  Hz, 1H), 7.43 (t,  $J = 7.5$  Hz, 2H), 5.91 (m with fine splitting, 1H), 5.62 (s, 1H), 2.07 (m with fine splitting, 3H).

$^{13}\text{C}$  NMR (125 MHz,  $\text{CDCl}_3$ ): 198.4, 143.7, 137.7, 132.0, 129.4, 128.1, 127.1, 18.6.

Enone **1i**<sup>2</sup> was prepared by the reaction of hexyl magnesium iodide with acrolein followed by oxidation of the resulting alcohol with PCC.

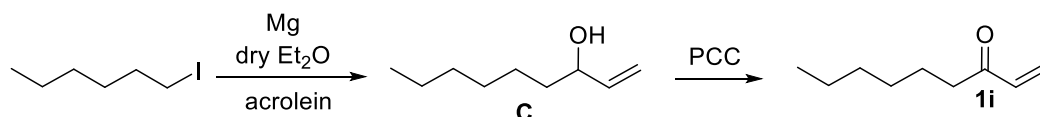

To a flame-dried two-necked round bottom flask equipped with an addition funnel and a condenser were added magnesium turnings (15.0 mmol) and 10 mL anhydrous  $\text{Et}_2\text{O}$  under an Ar atmosphere. A solution of 1-iodohexane (10.0 mmol) in 5 mL anhydrous  $\text{Et}_2\text{O}$  was added dropwise and after formation of the Grignard reagent was ensured, the mixture was cooled to 0 °C. Freshly distilled acrolein (10.0 mmol) was added dropwise and the mixture was refluxed for 2 h. The reaction was quenched with 2 mL of  $\text{NH}_4\text{Cl}_{(\text{aq})}$  and the mixture was extracted with diethyl ether. The organic residue was purified by flash chromatography (n-Hexane/ $\text{EtOAc}$ : 10/1) to afford the allylic alcohol **C** in 89% isolated yield. The alcohol (2 mmol) was oxidized with PCC (3 mmol) in DCM at room temperature for 4 h. Upon completion (TLC) the mixture was passed through Celite and the residue was purified by column chromatography (n-Hexane/ $\text{EtOAc}$ : 20/1) to afford enone **1i** (as a yellow oil) in 71% isolated yield.

$^1\text{H}$  NMR of **1i** ( $\text{CDCl}_3$ , 500 MHz): 6.34 (dd,  $J_1 = 18.0$  Hz,  $J_2 = 11.0$  Hz, 1H), 6.21 (dd,  $J_1 = 18.0$  Hz,  $J_2 = 1.0$  Hz, 1H), 5.81 (dd,  $J_1 = 11.0$  Hz,  $J_2 = 1.0$  Hz, 1H), 2.57 (t,  $J = 7.0$  Hz, 2H), 1.64-1.58 (m, 2H), 1.33-1.24 (m, 6H), 0.88 (t,  $J = 7.0$  Hz, 3H).

$^{13}\text{C}$  NMR (125 MHz,  $\text{CDCl}_3$ ): 201.1, 136.6, 127.8, 39.6, 31.6, 28.9, 24.3, 22.5, 14.0.

Enone **1j**<sup>3</sup> was prepared by treatment of crotonic acid with 2 equiv of *n*-BuLi in dry THF at -78 °C, and then warming to 0 °C.

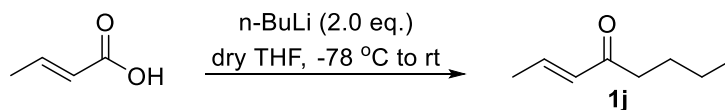

To a flame-dried two-necked round bottom flask was added 5.81 mmol of methacrylic acid and 10 mL anhydrous THF under an Ar atmosphere. *n*-BuLi (1.6 M in hexane, 2.0 equiv) was added dropwise at -78 °C and the mixture was stirred at this temperature for 2 h. Then 0.5 mL  $\text{H}_2\text{O}$  was added dropwise and the mixture was filtered through a pad of Celite.

Enone **1j** was isolated upon column chromatography (*n*-Hexane/EtOAc: 30/1) as a yellow oil in 81% isolated yield.

<sup>1</sup>H NMR of **1j** (CDCl<sub>3</sub>, 500 MHz): 6.84 (qd,  $J_1 = 16.0$  Hz,  $J_2 = 7.0$  Hz, 1H), 6.12 (qd,  $J_1 = 16.0$  Hz,  $J_2 = 1.5$  Hz, 1H), 2.51 (t,  $J = 7.5$  Hz, 2H), 1.89 (m, 3H), 1.61-1.55 (m, 2H), 1.36-1.30 (m, 2H), 0.90 (t,  $J = 7.0$  Hz, 3H).

<sup>13</sup>C NMR (125 MHz, CDCl<sub>3</sub>): 200.8, 142.3, 131.9, 39.7, 26.4, 22.4, 18.2, 13.9.

## References

1. S. M. Hell, C. F. Meyer, G. Laudadio, A. Misale, M. C. Willis, T. Noel, A. A. Trabanco and V. Gouverneur, *J. Am. Chem. Soc.* 2020, **142**, 720.
2. J. Liu and S. Ma, *Org. Lett.* 2013, **15**, 5150.
3. A. S.-Y. Lee, M.-C. Lin, S.-H. Wang and L.-S. Lin, *J. Chin. Chem. Soc.*, 2004, **51**, 371.

**$^1\text{H}$  and  $^{13}\text{C}$  NMR of synthesized enones**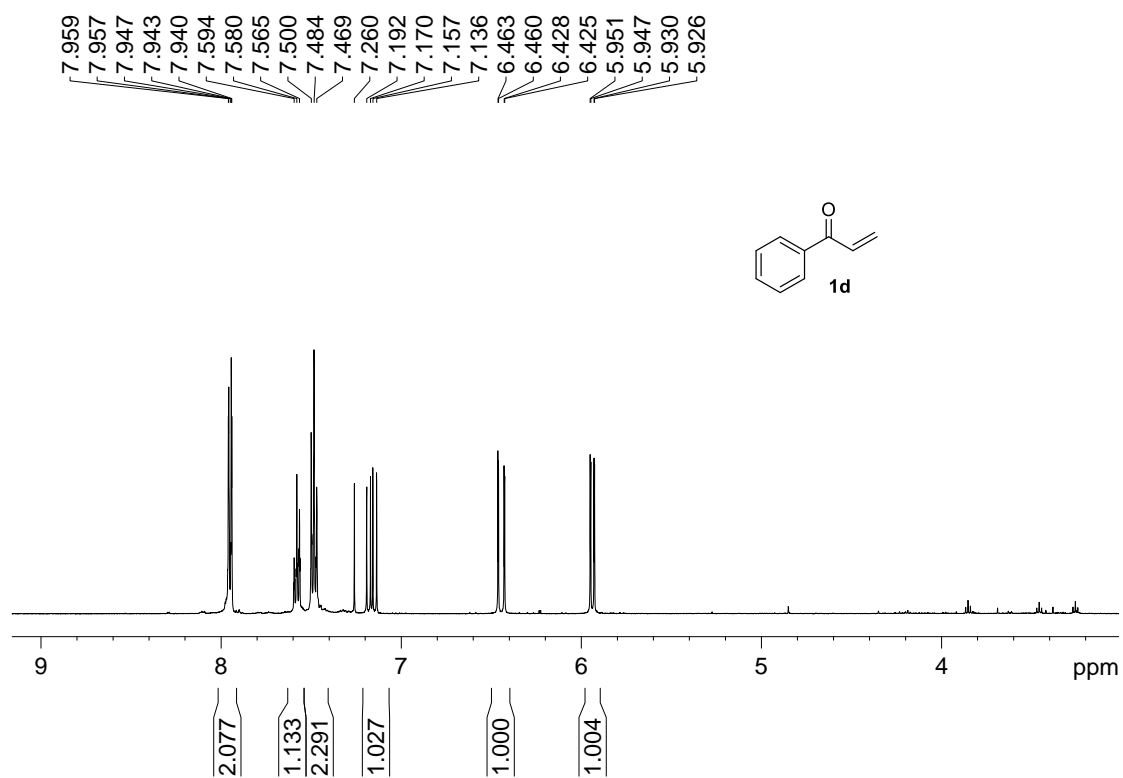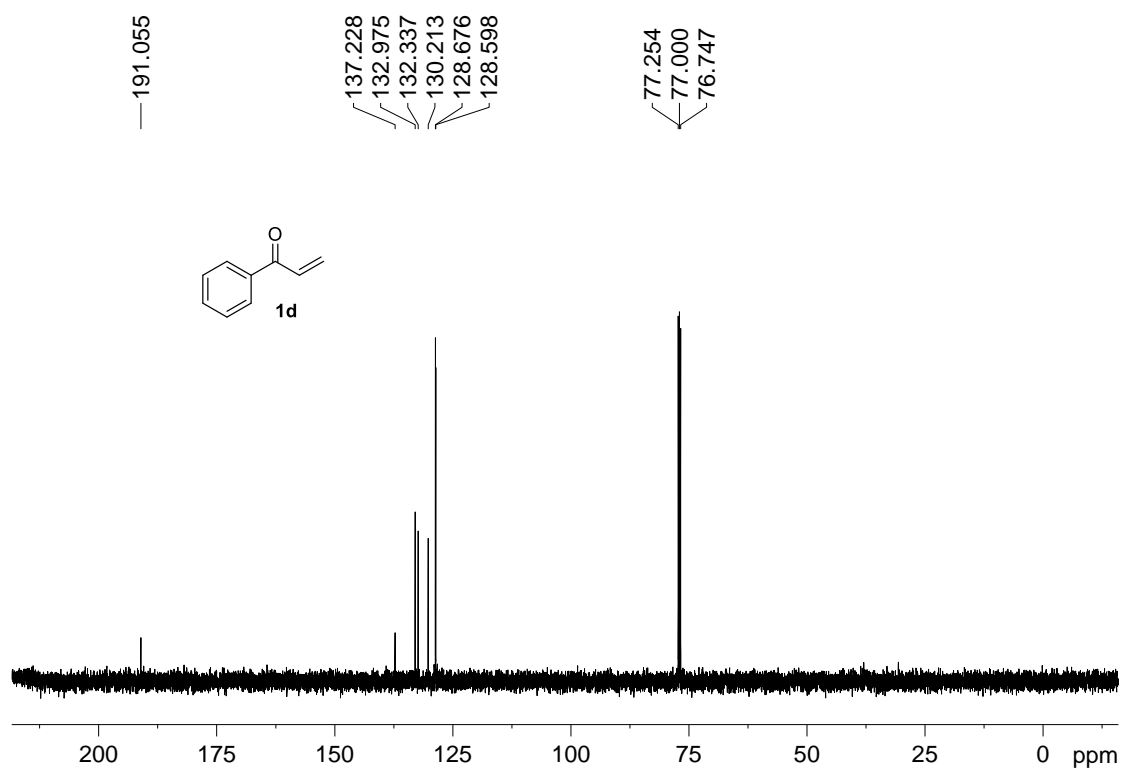

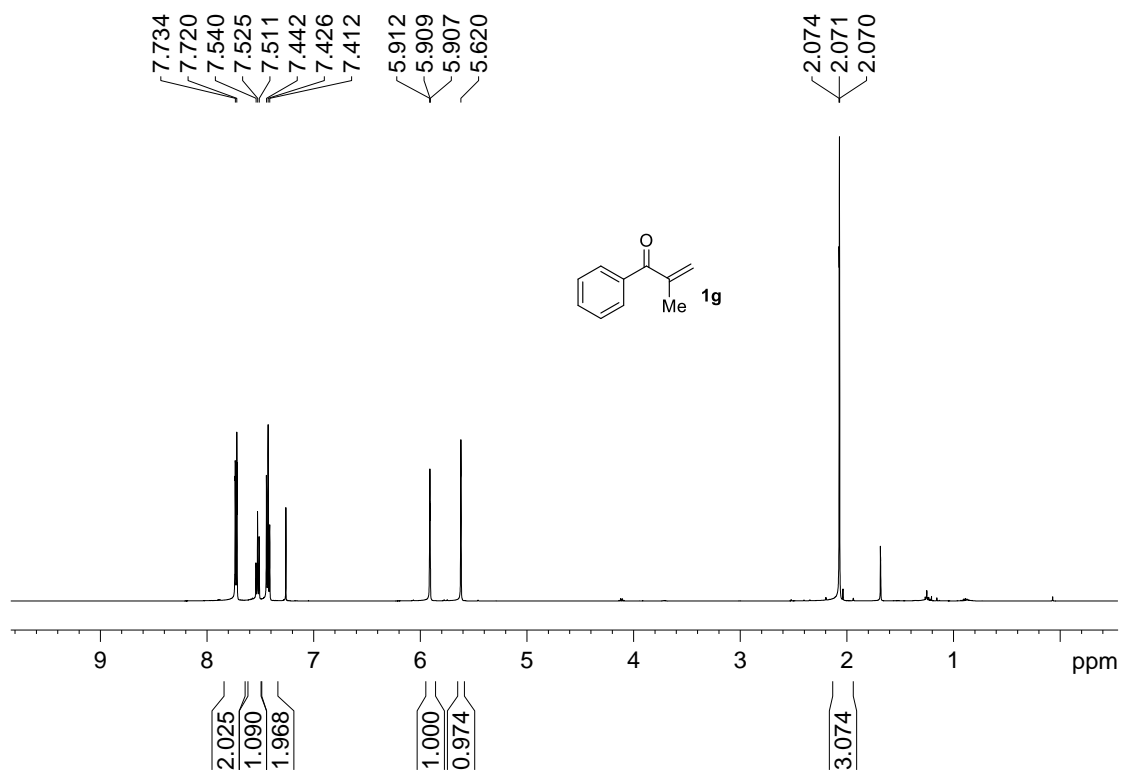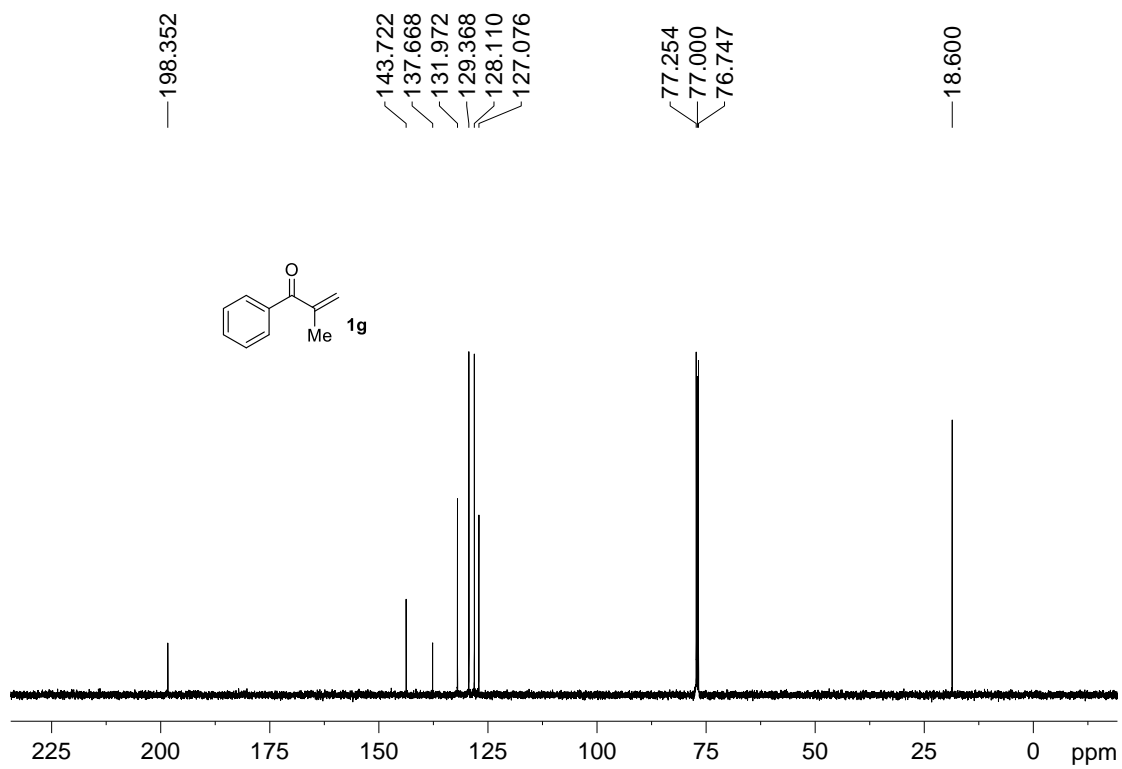

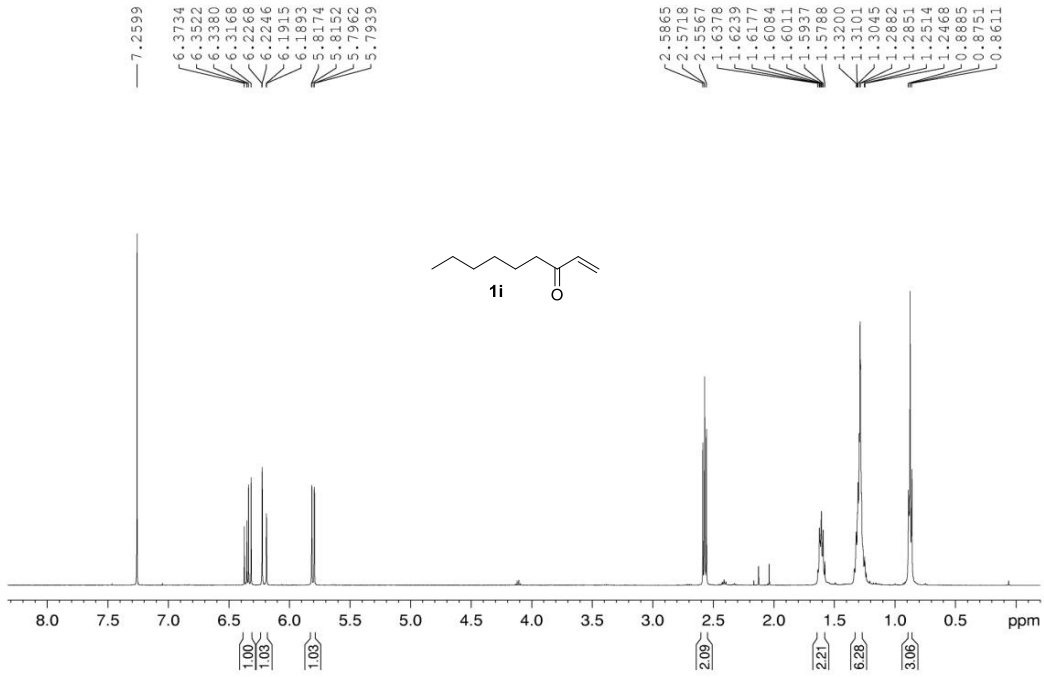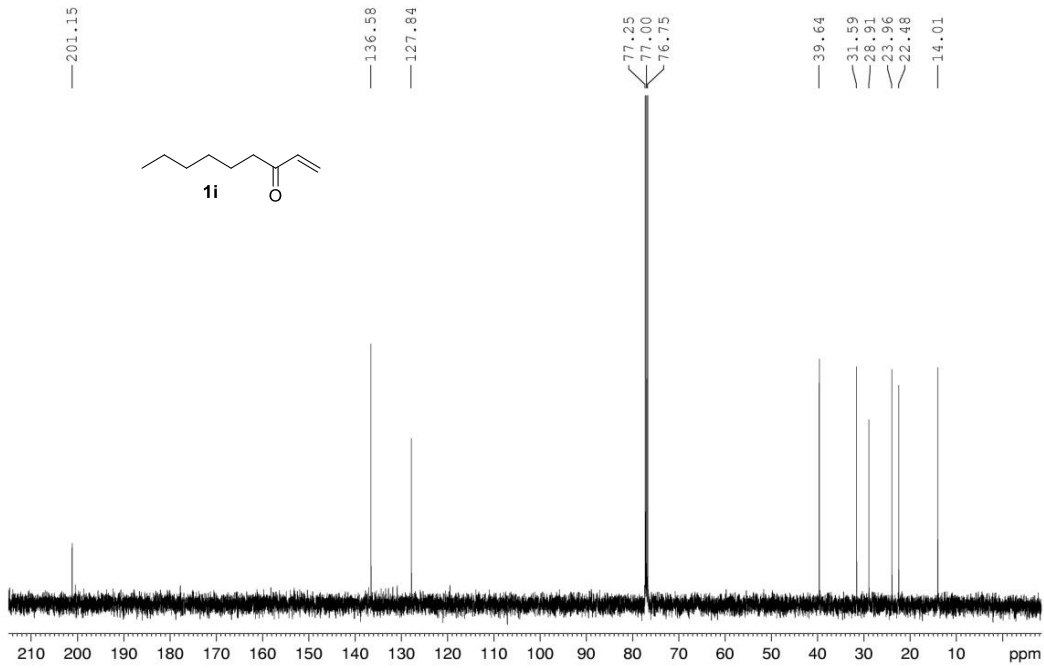

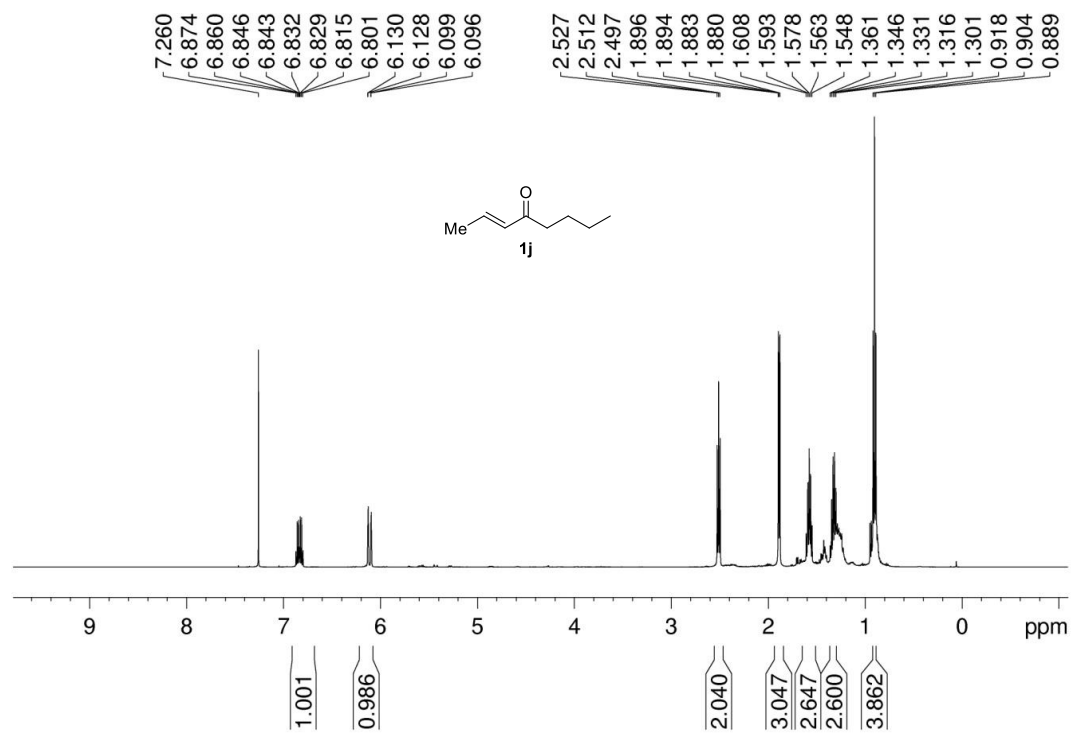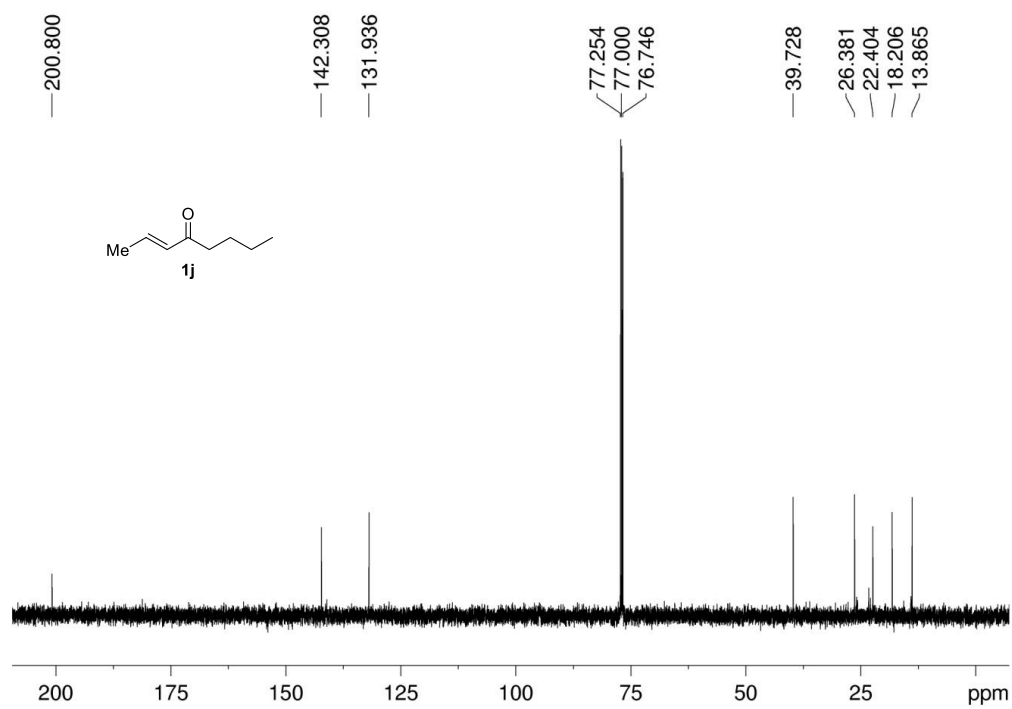



**$^1\text{H}$ ,  $^{13}\text{C}$  NMR and selected MS spectra of products**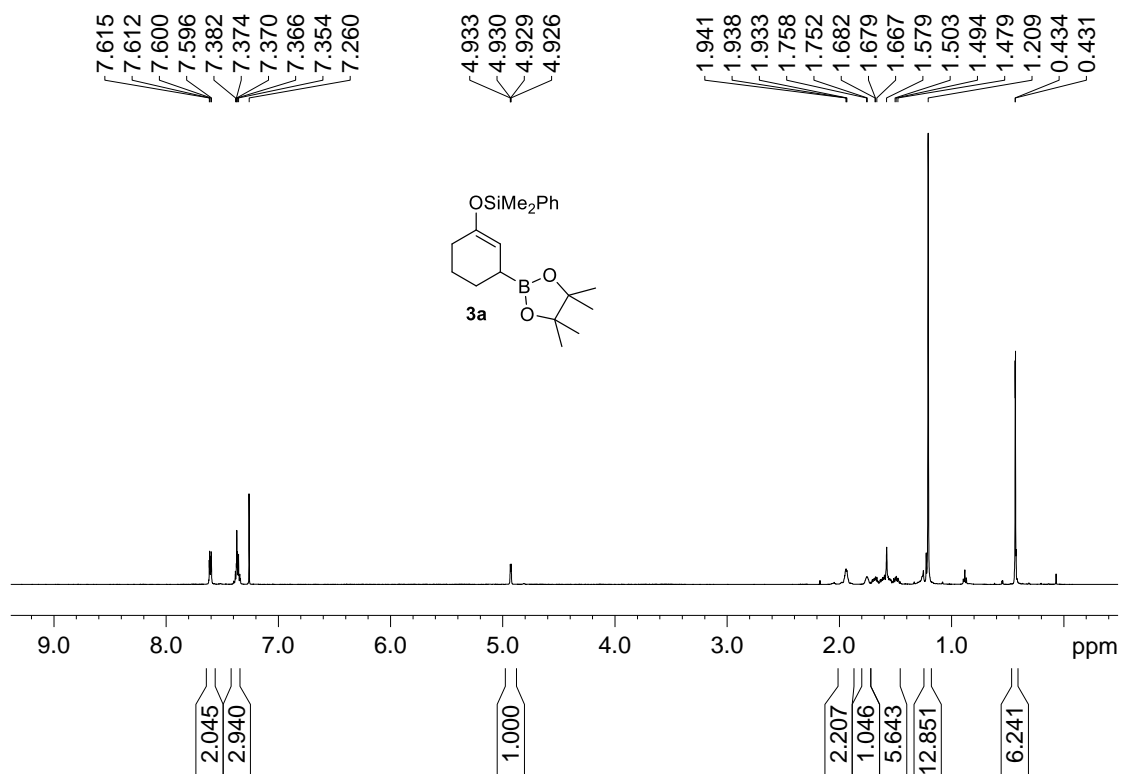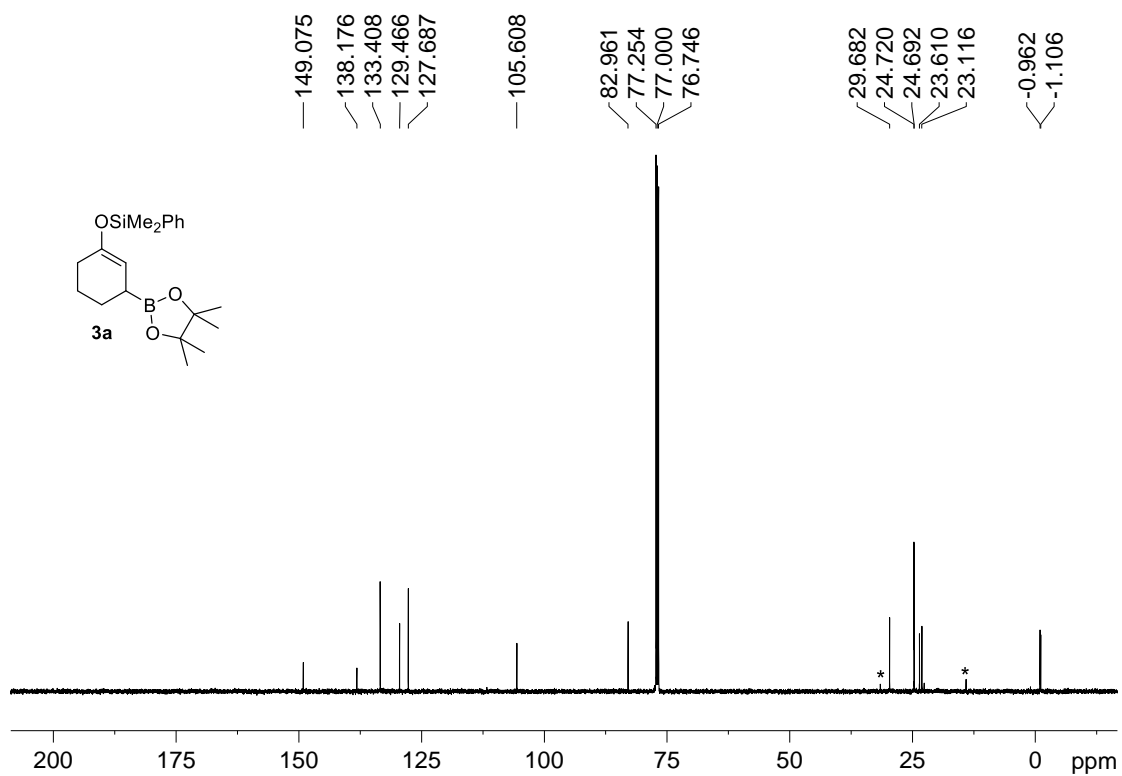

S10

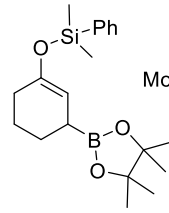

Molecular Weight: 358.36

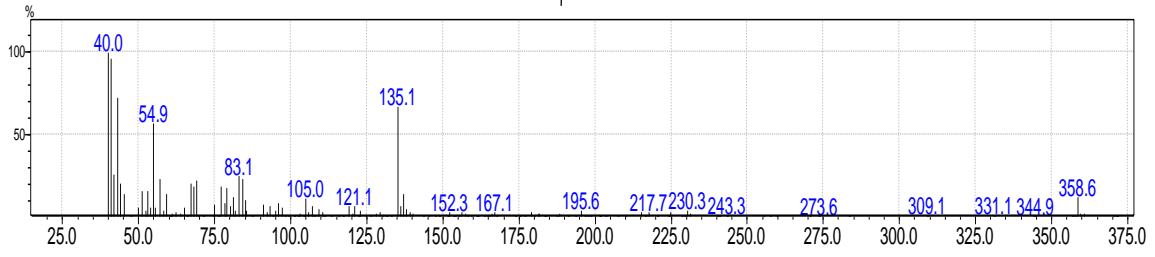

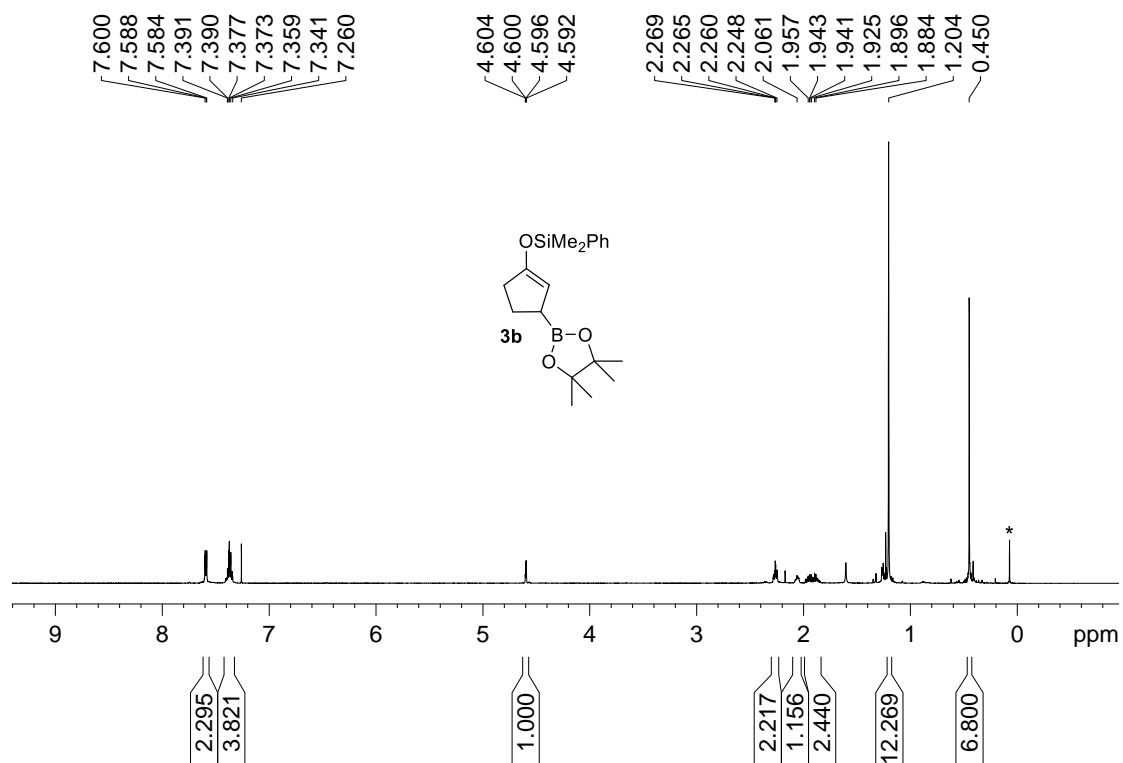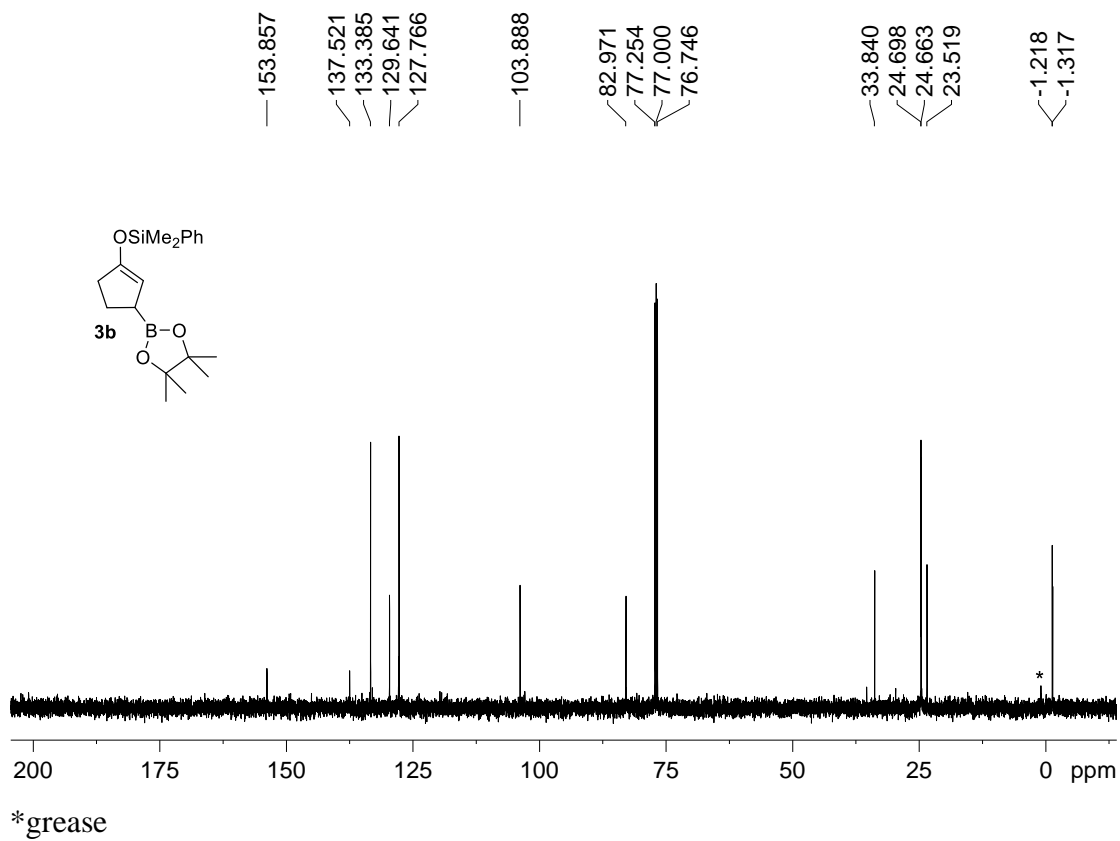

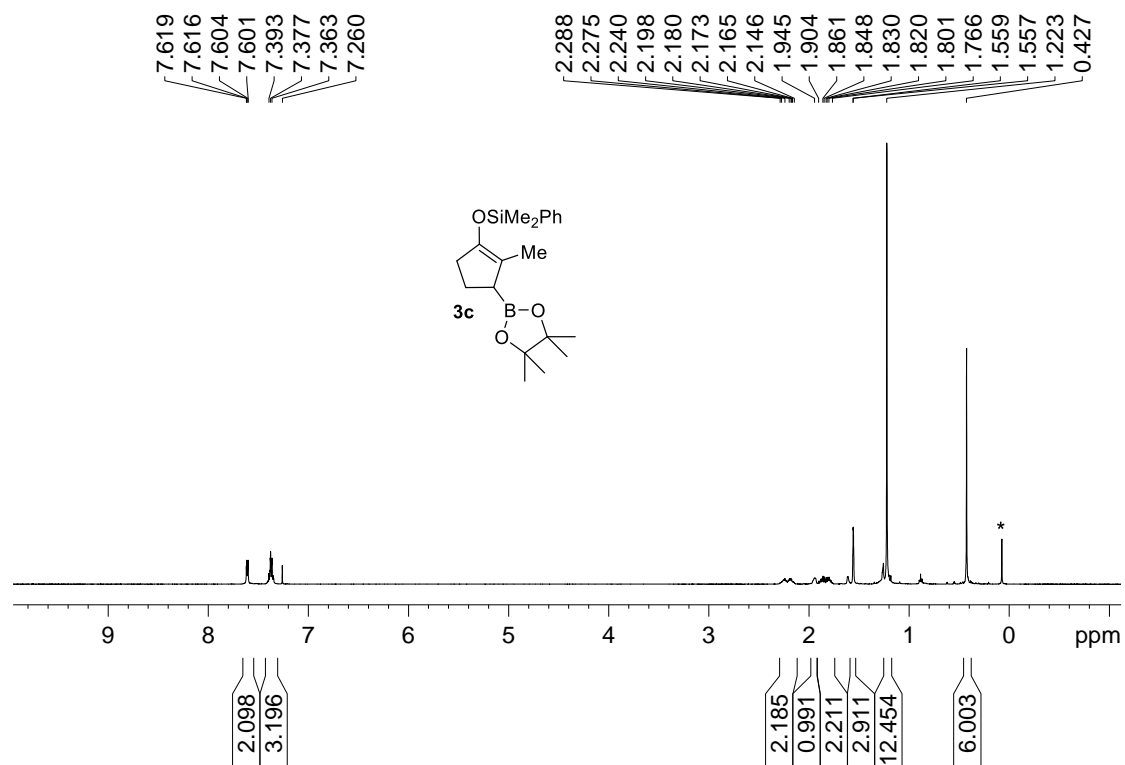

\*grease

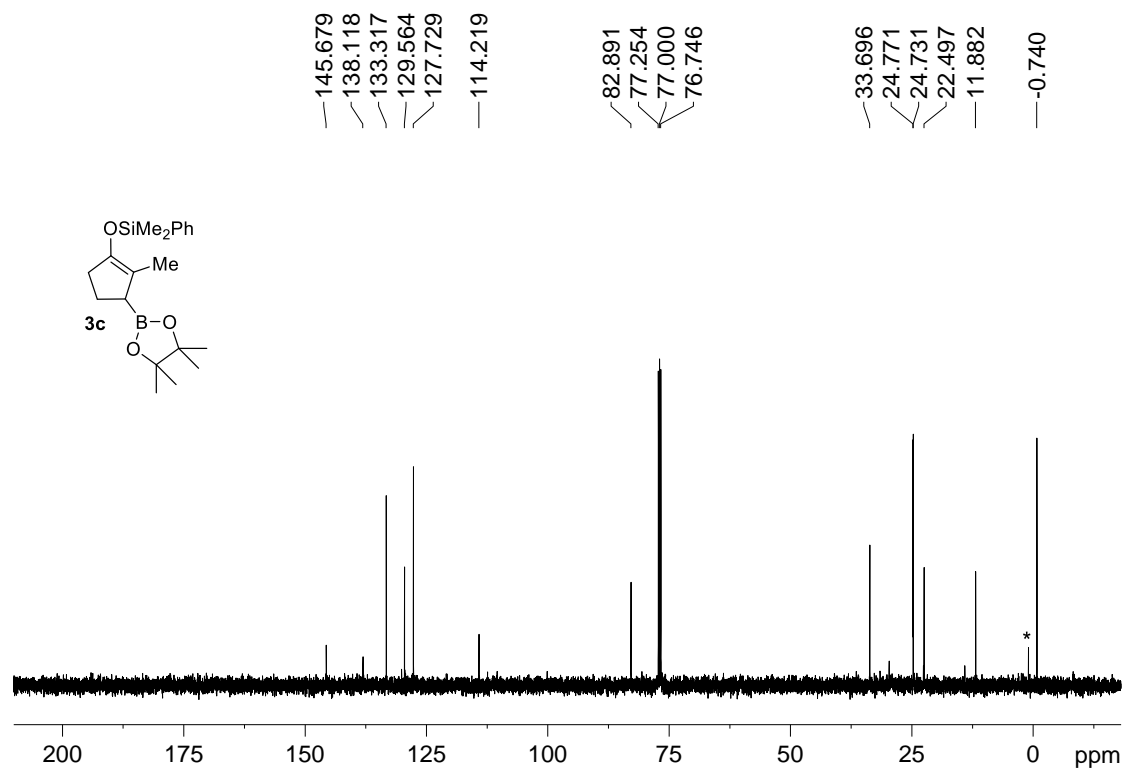

\*grease

S13

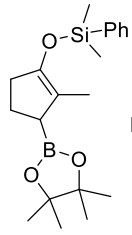

Molecular Weight: 358.36

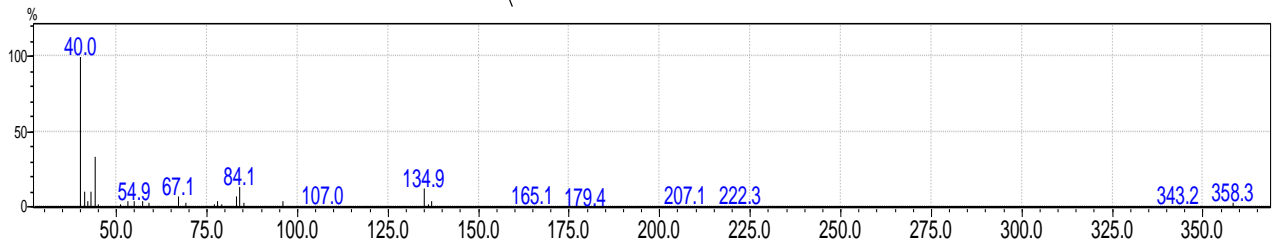

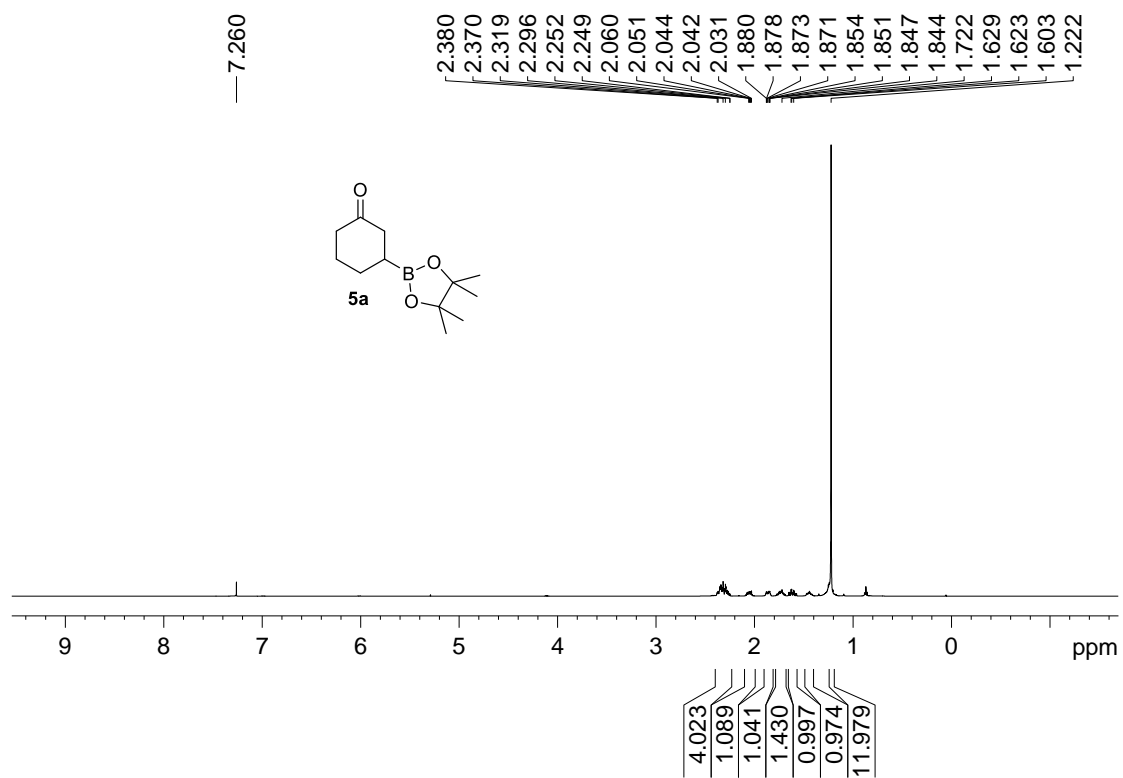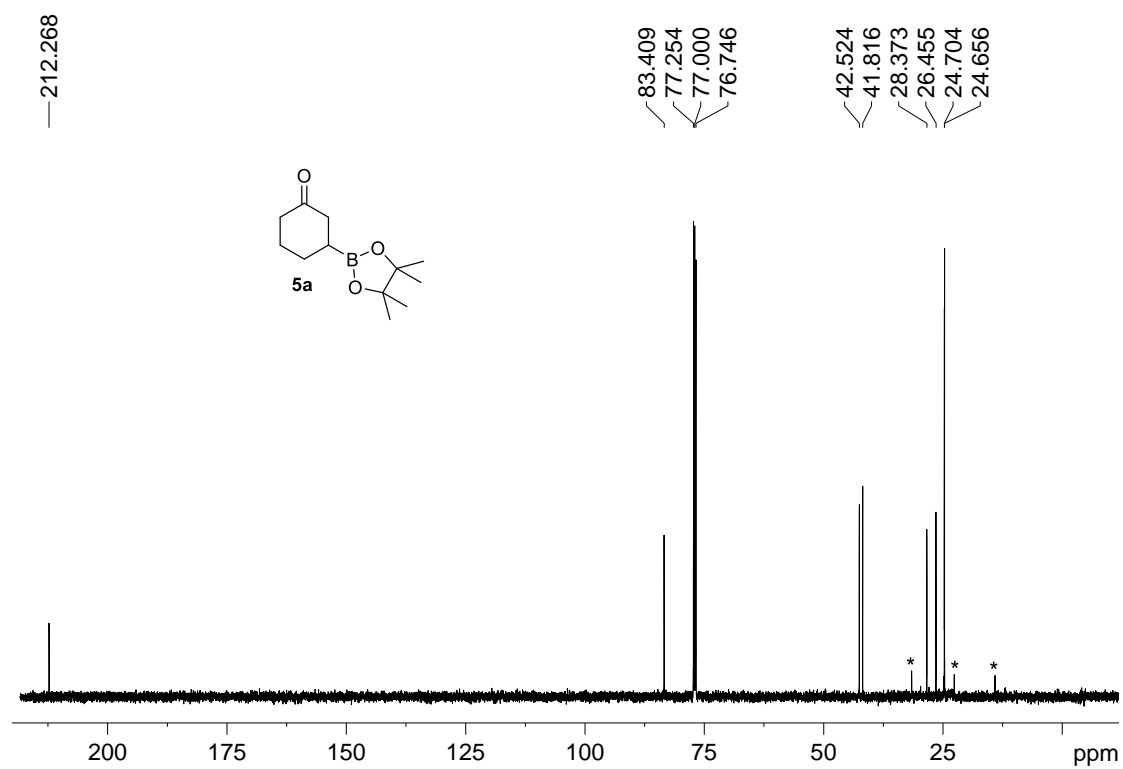

\*Hexane

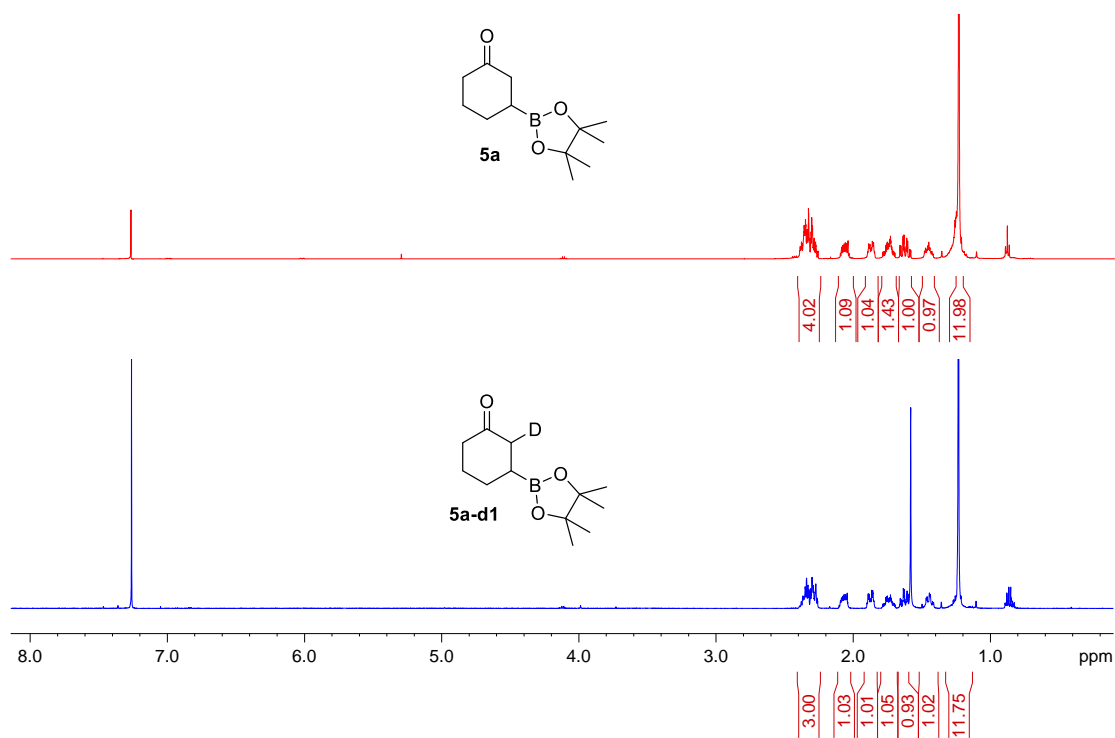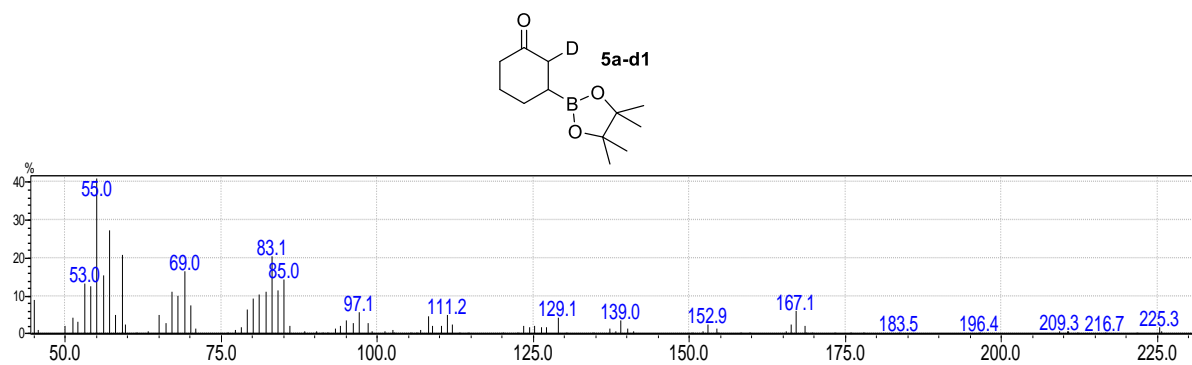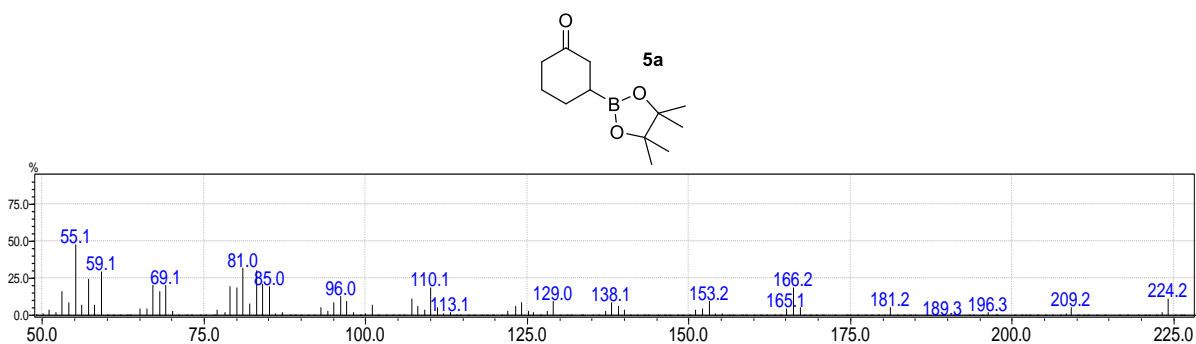

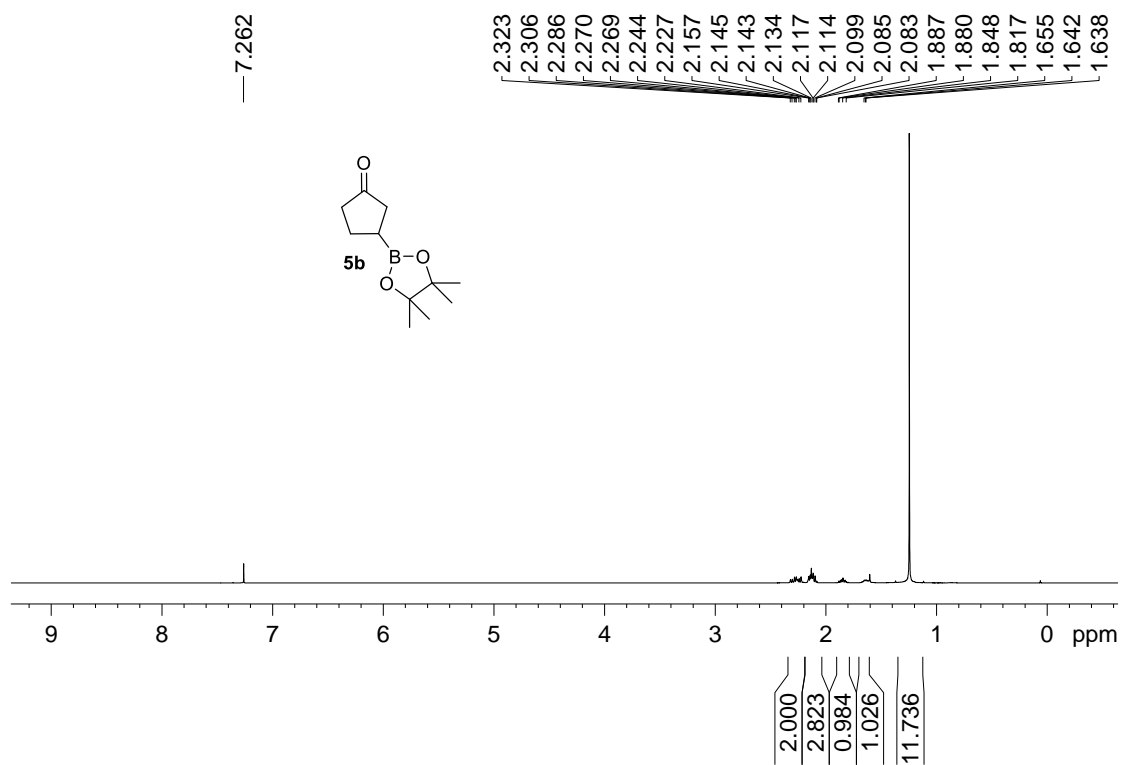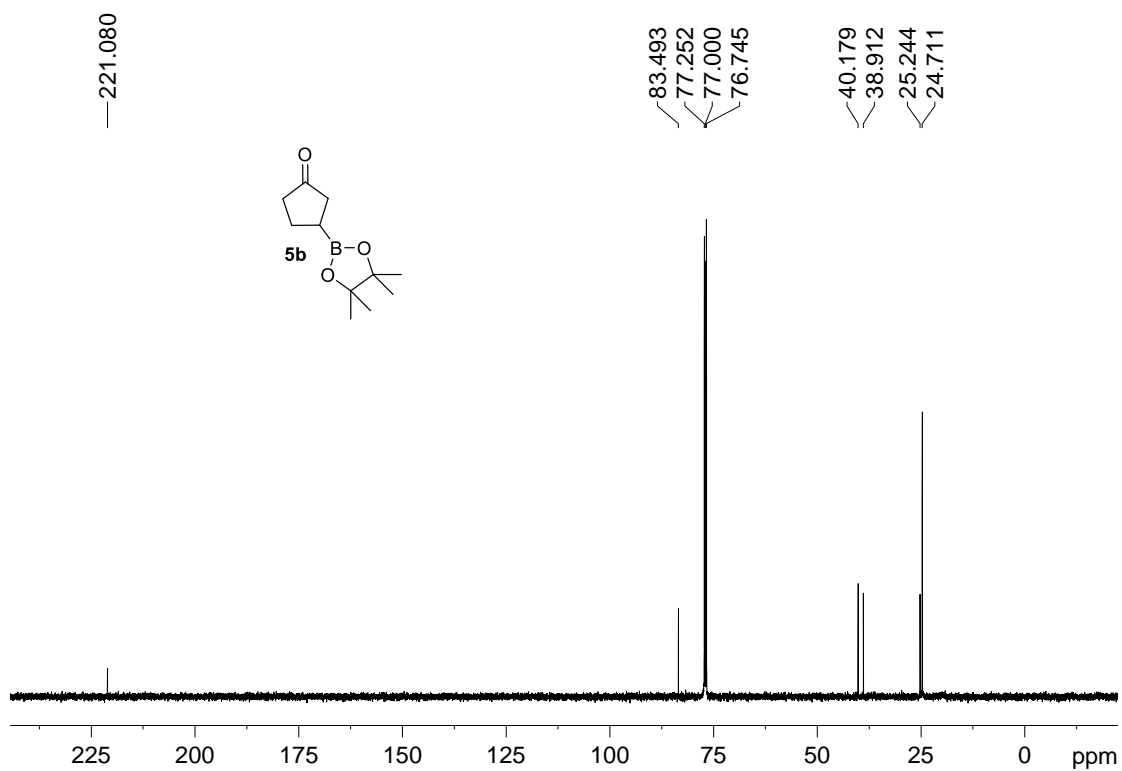



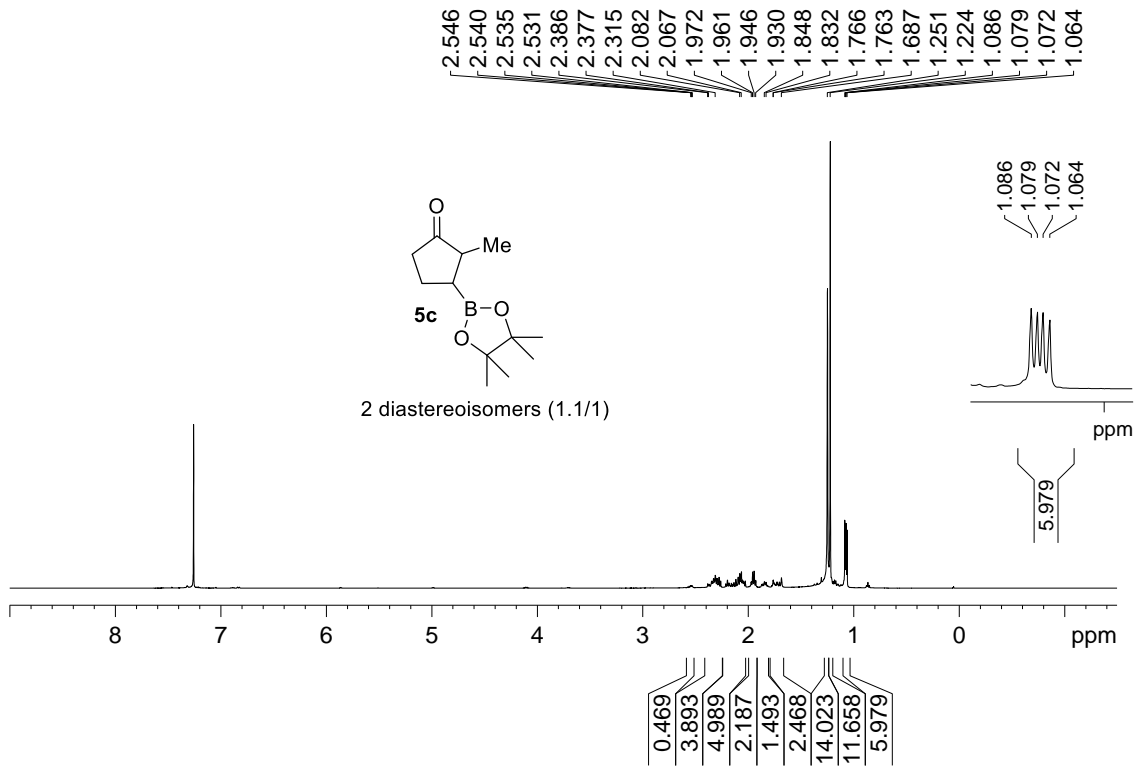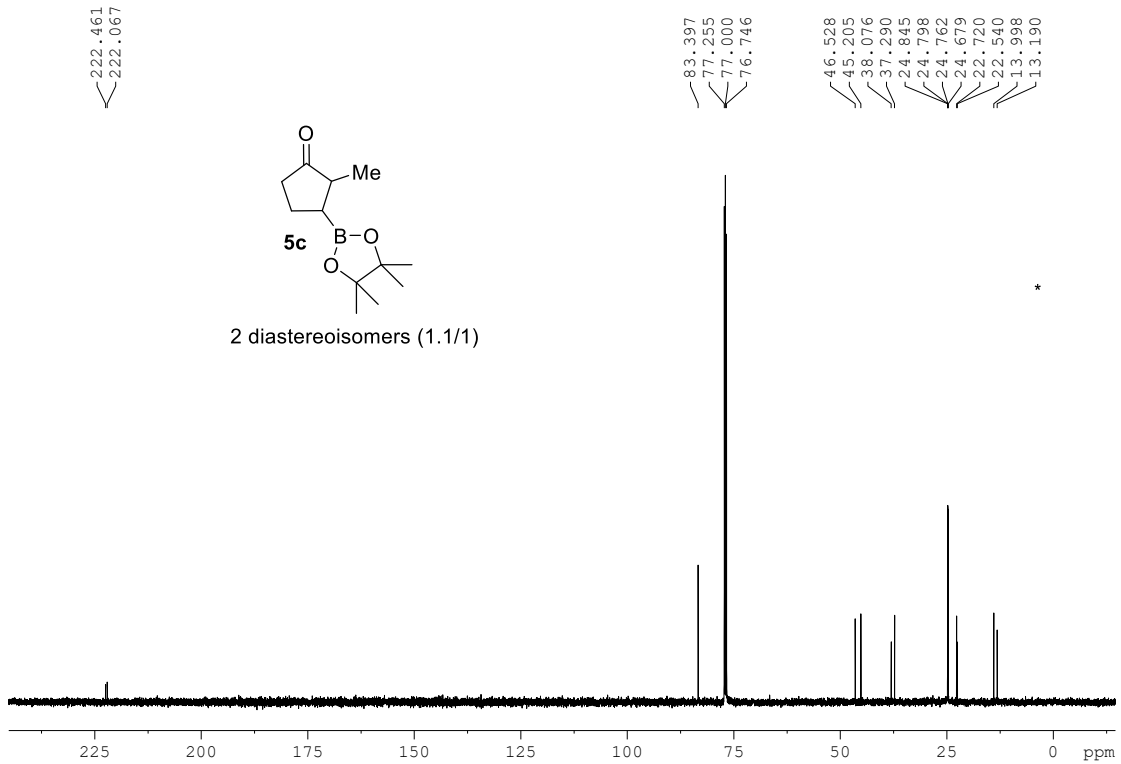

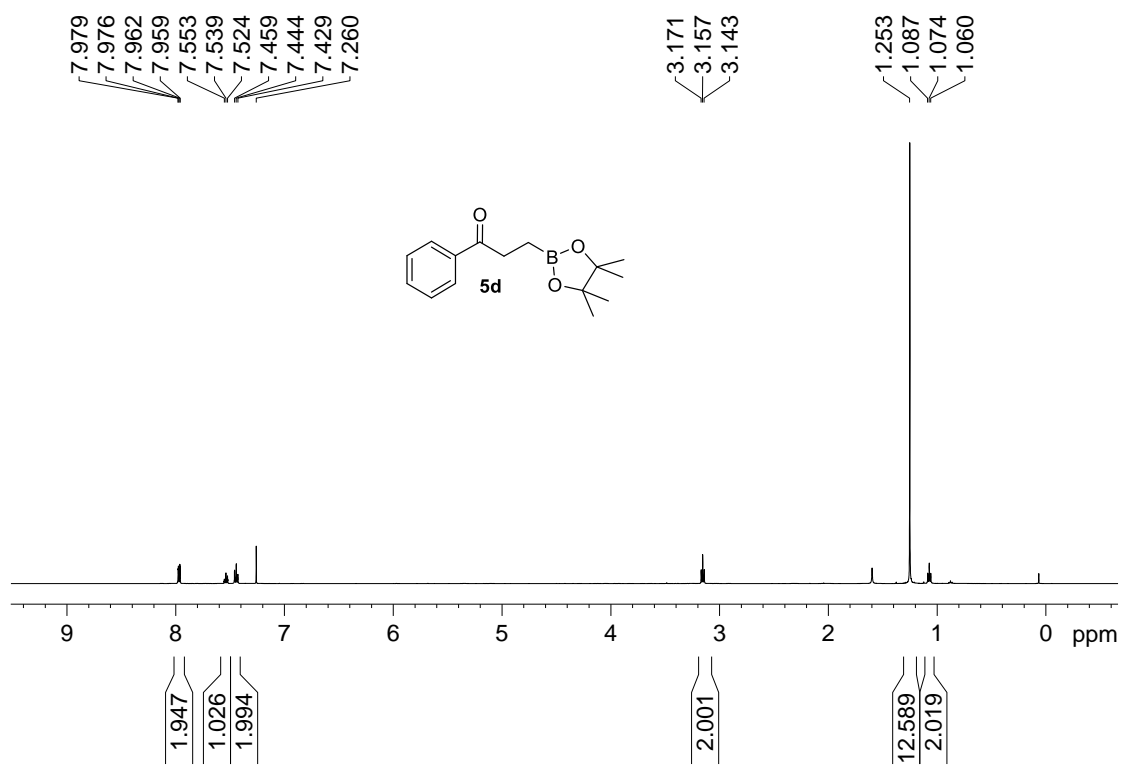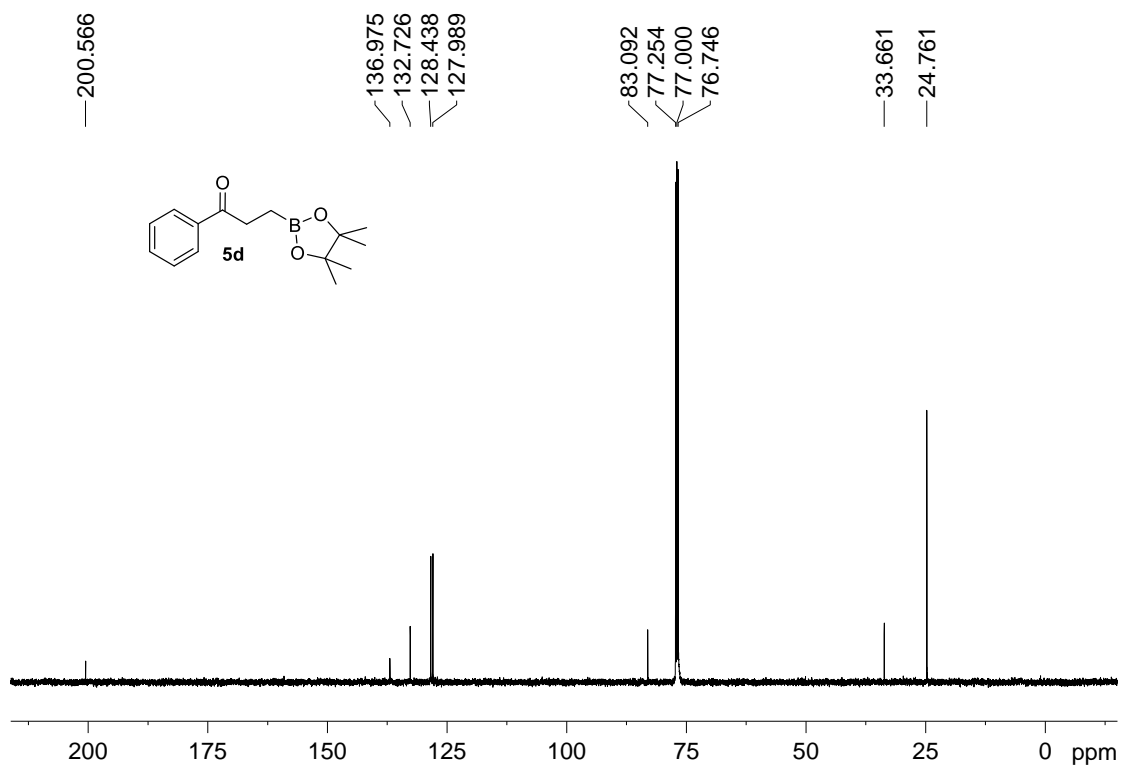

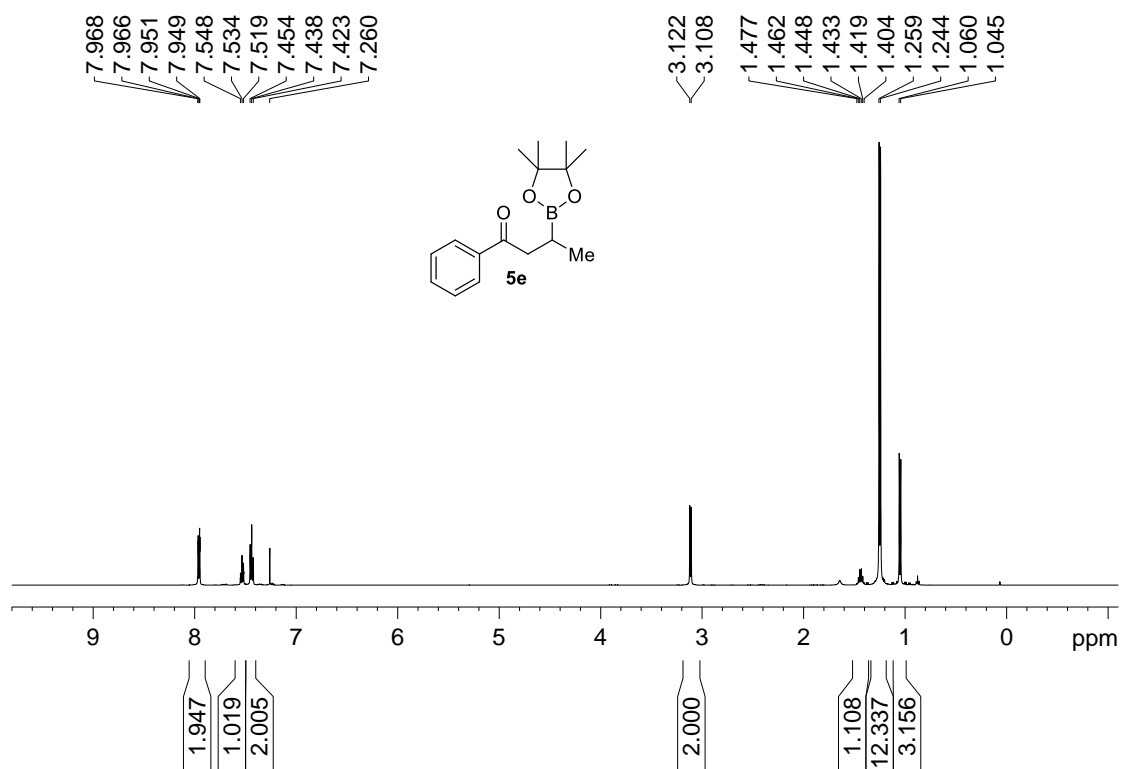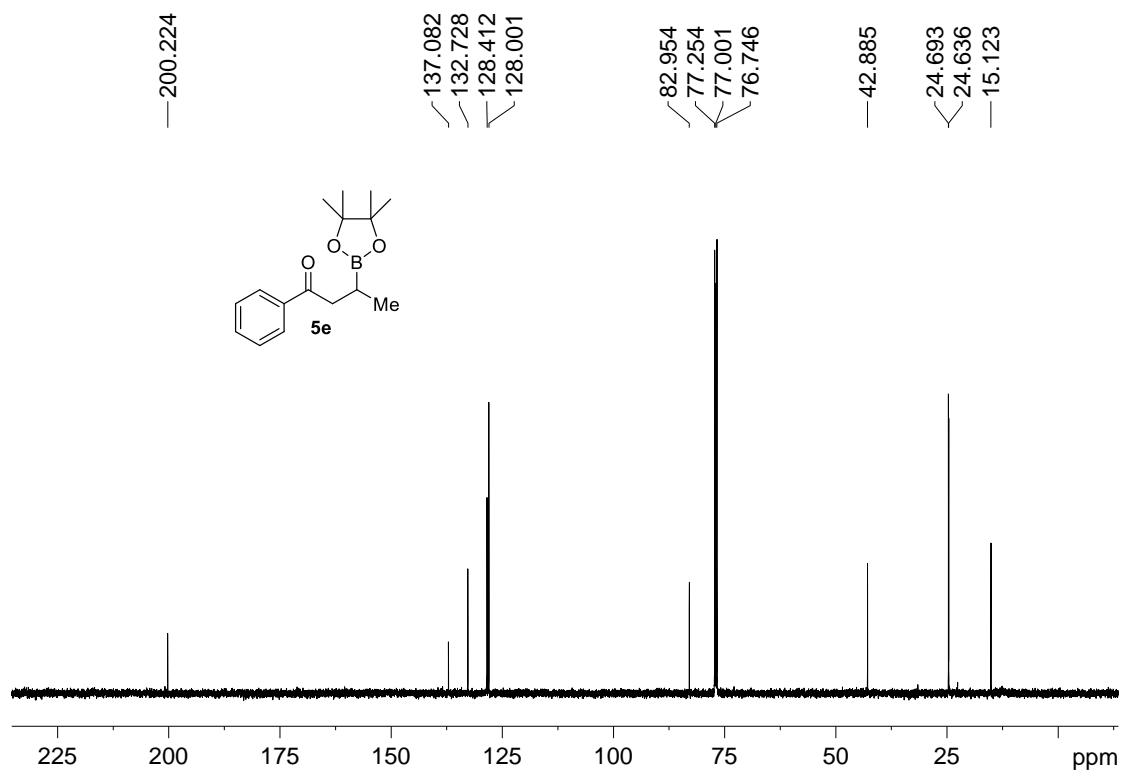

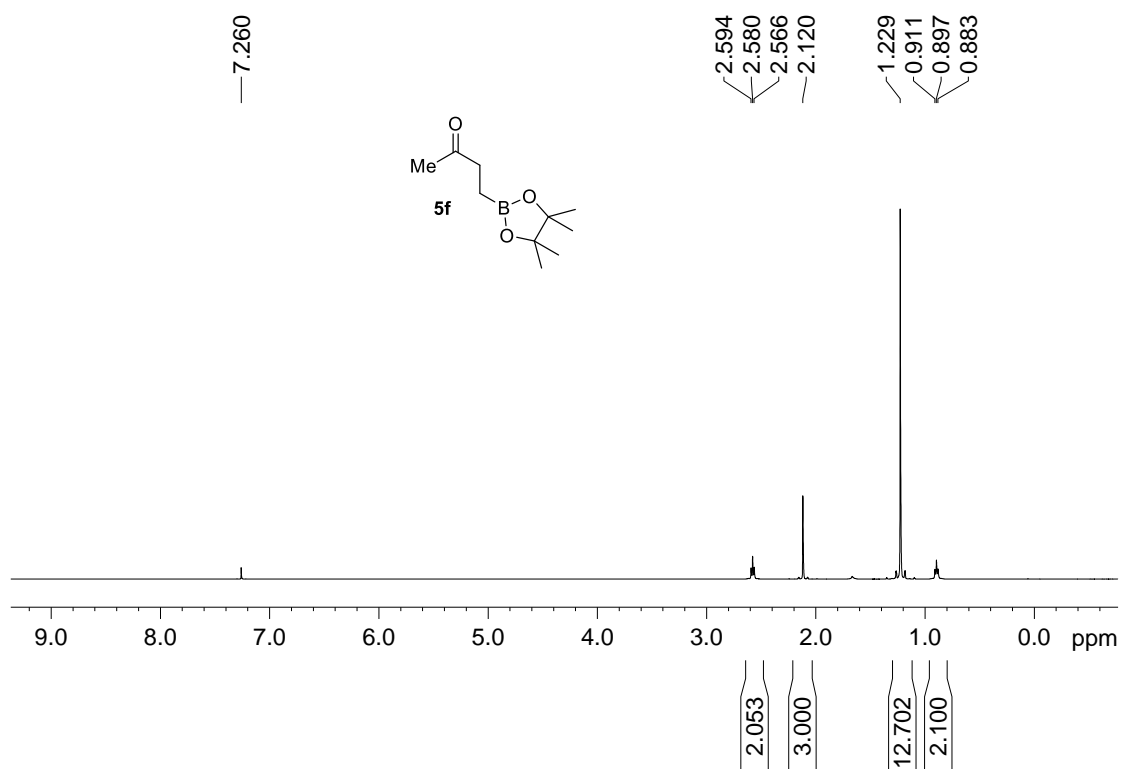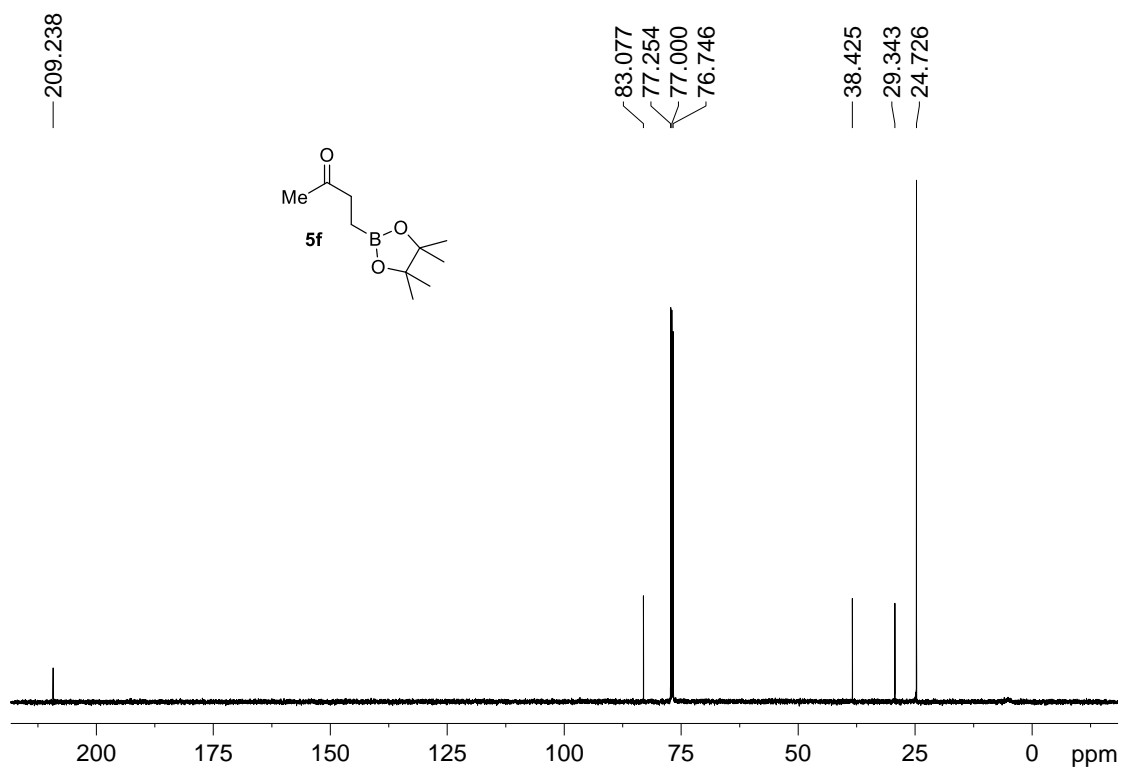

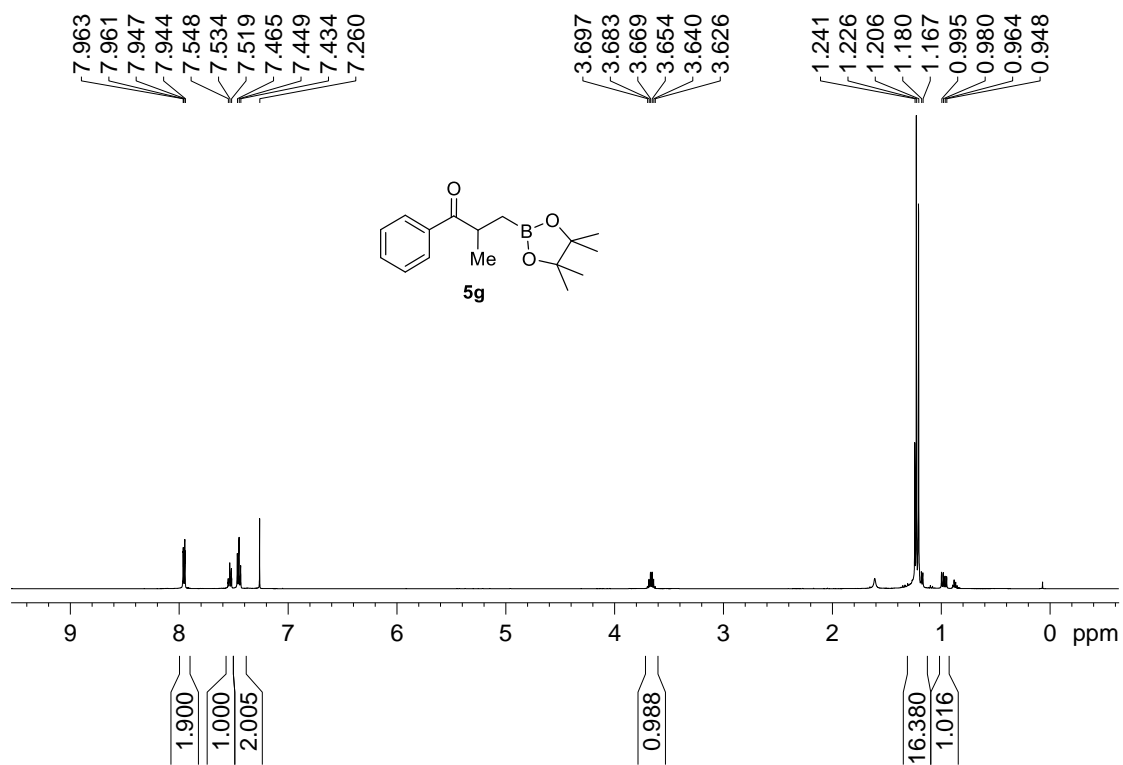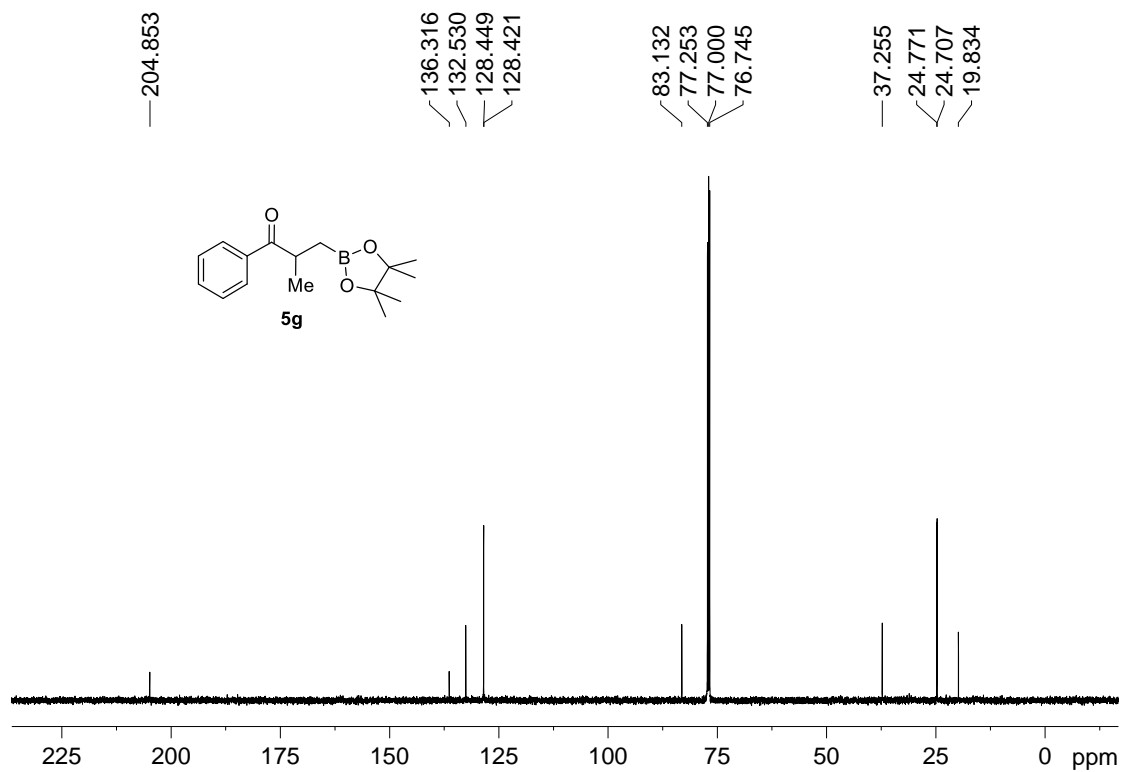

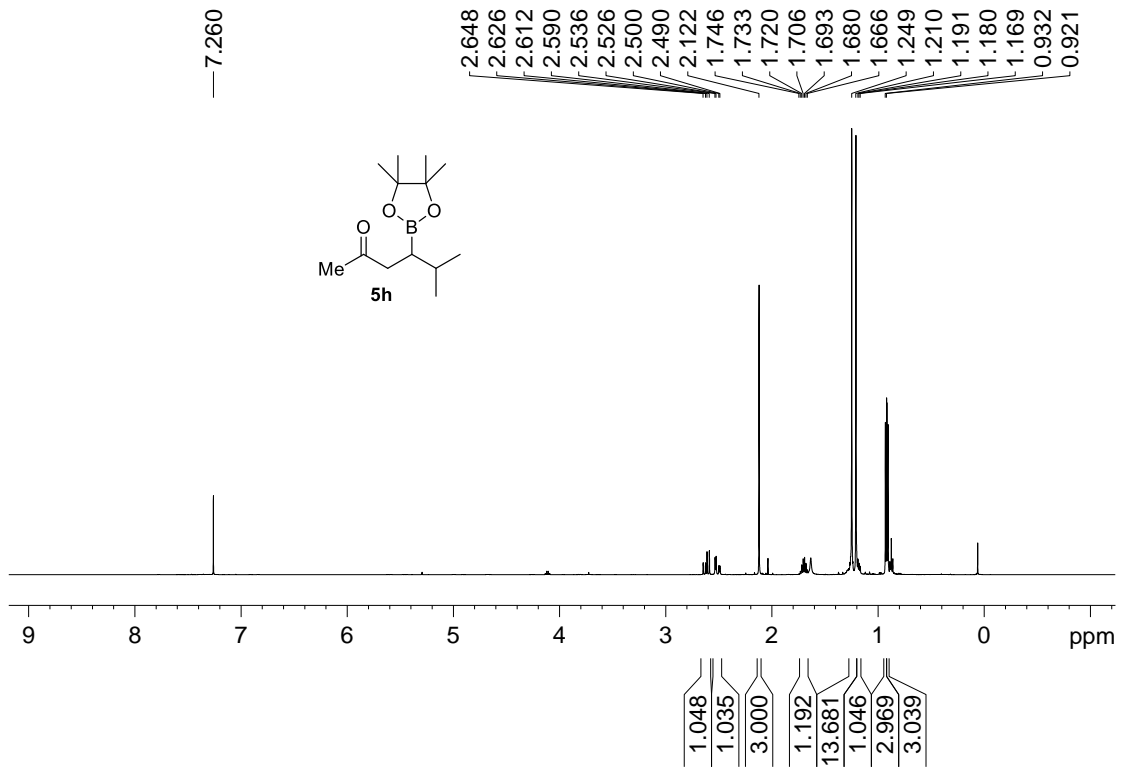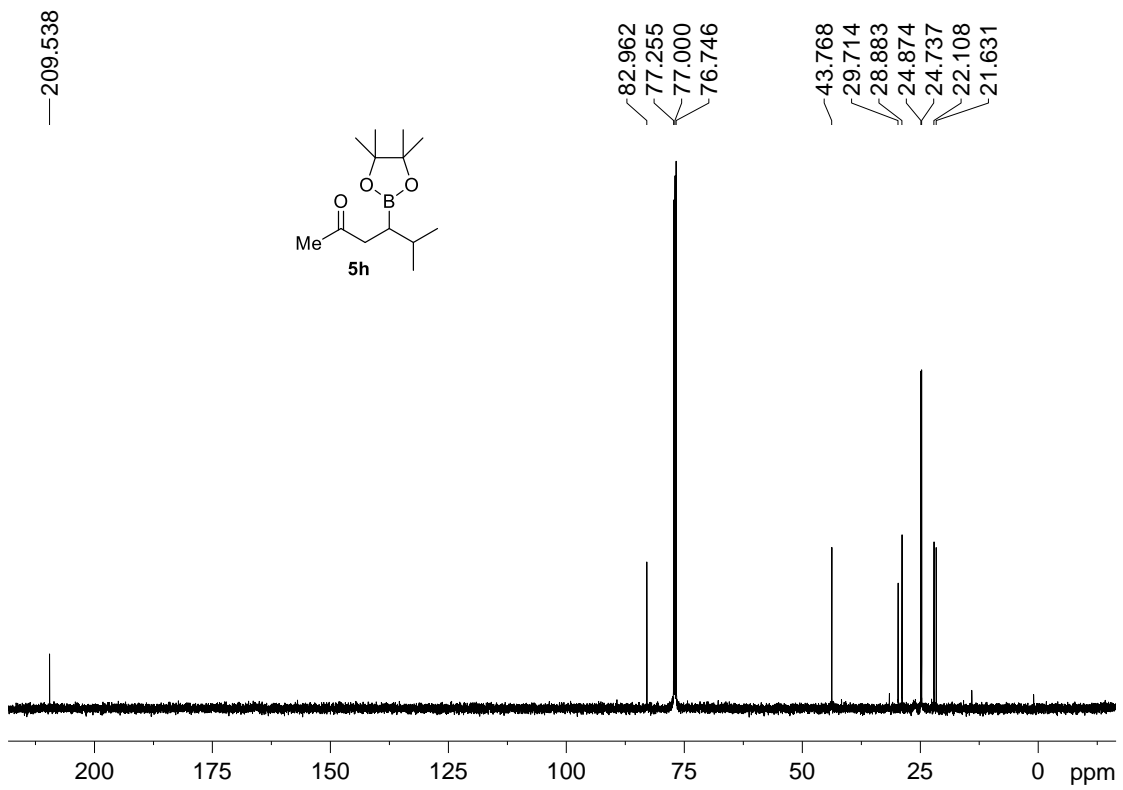

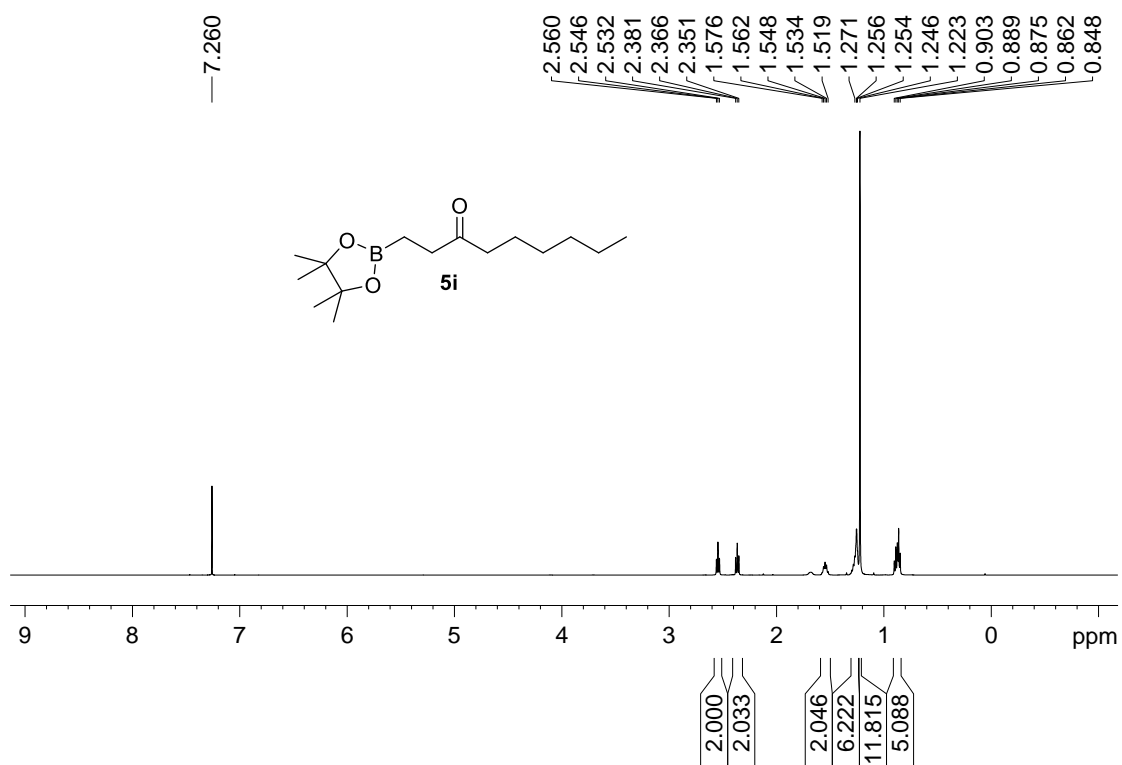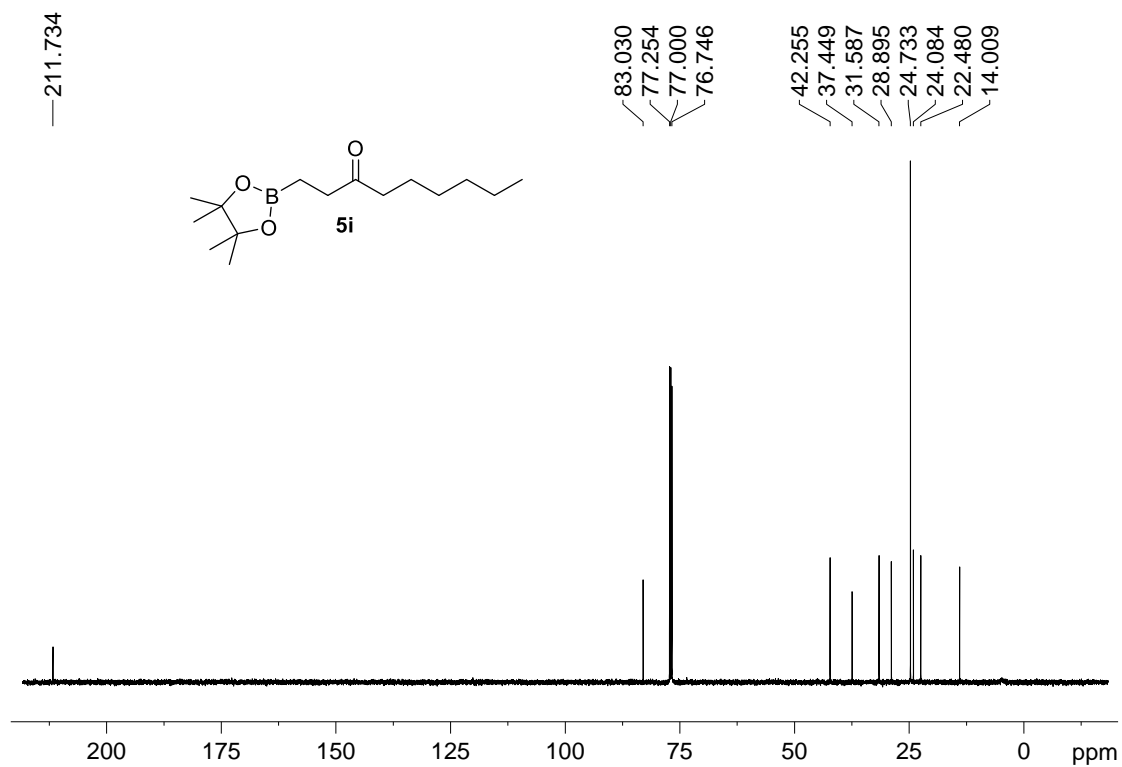

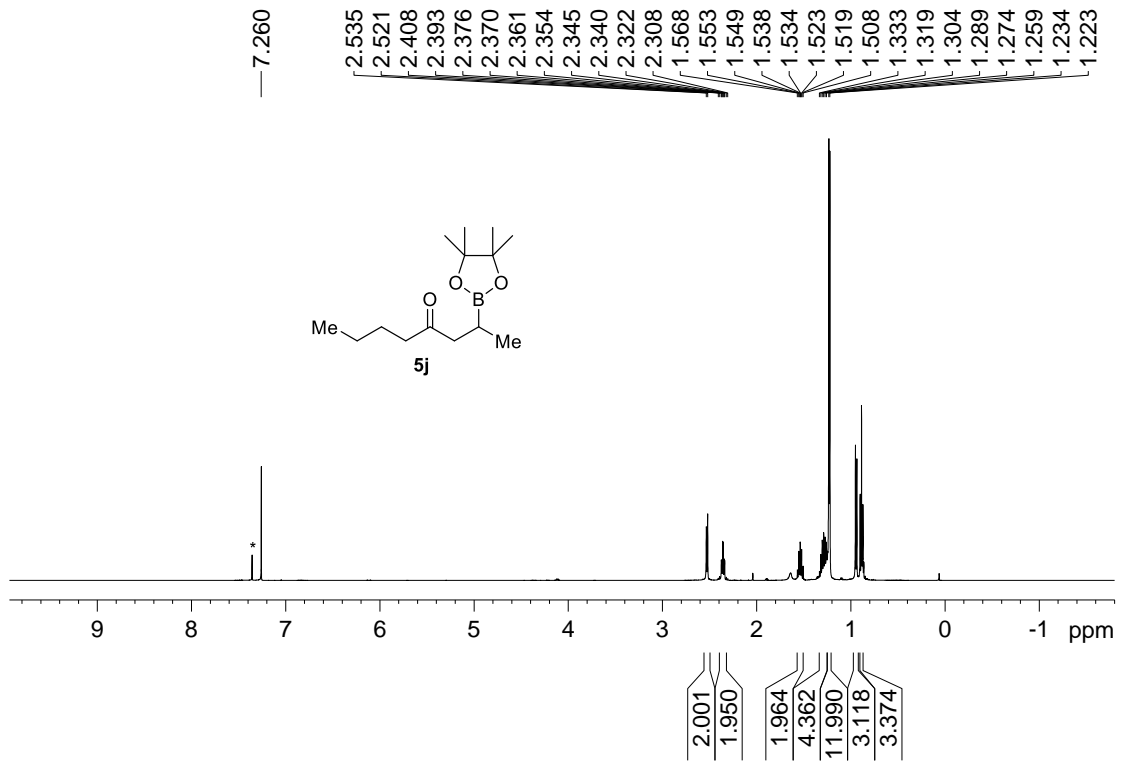

\*benzene

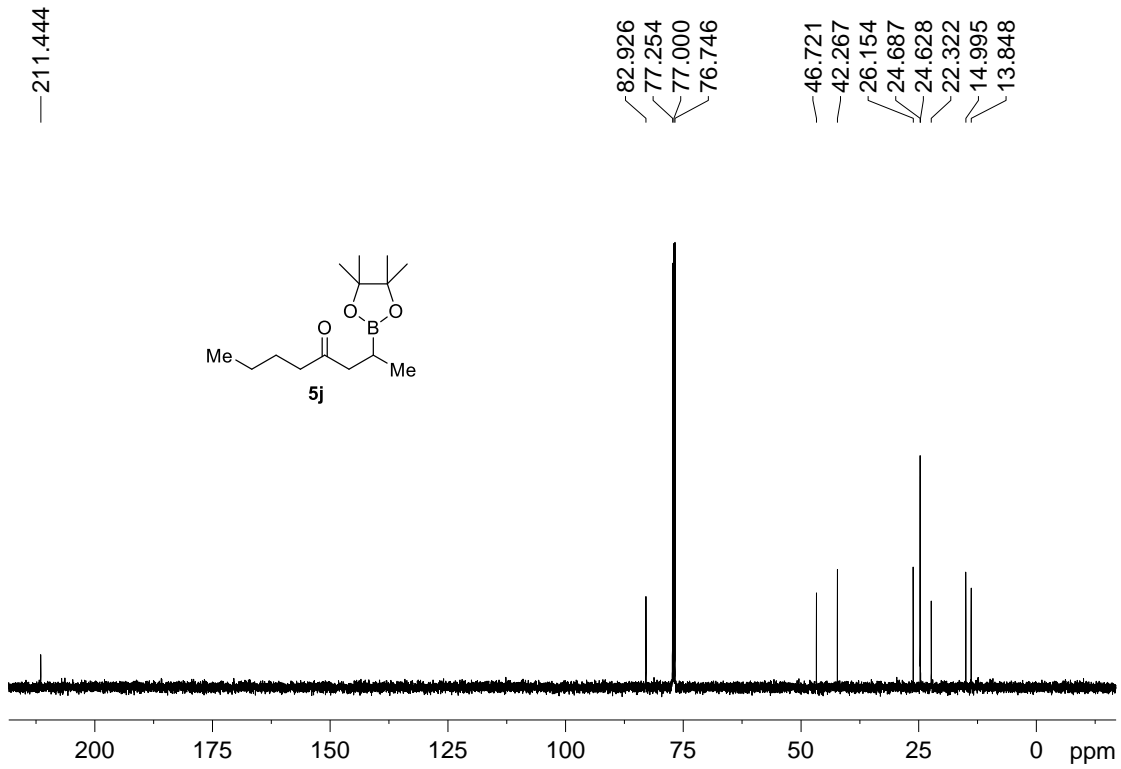



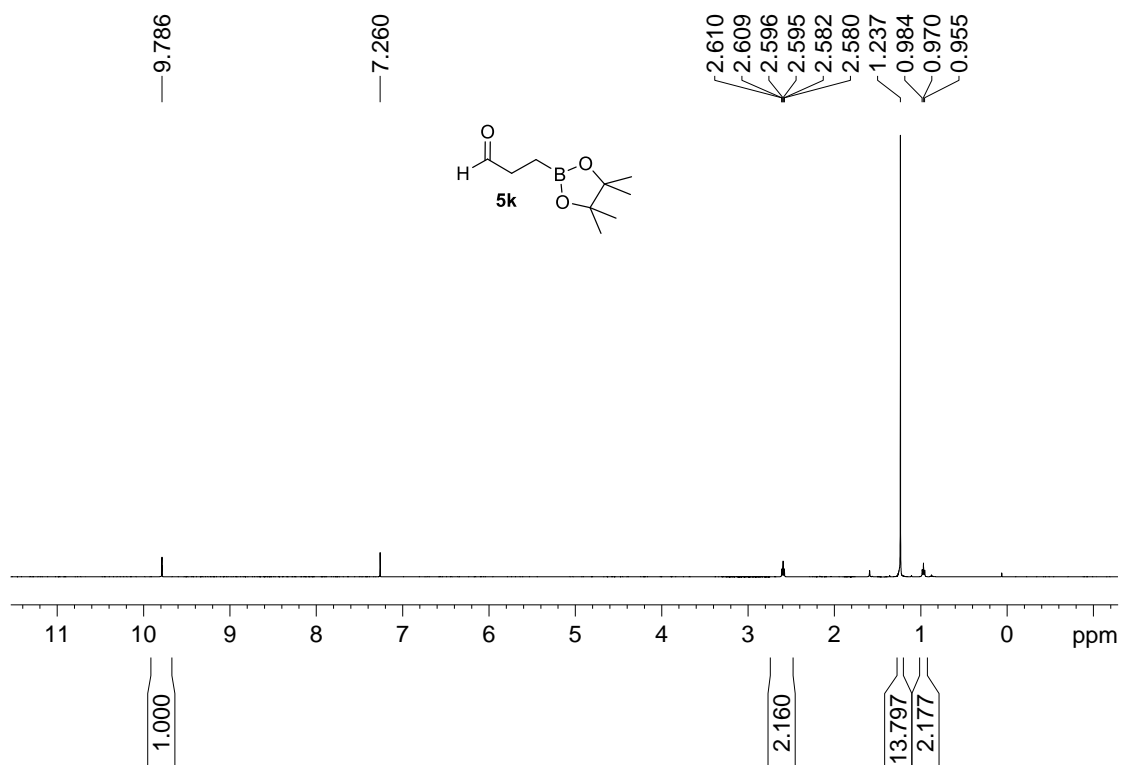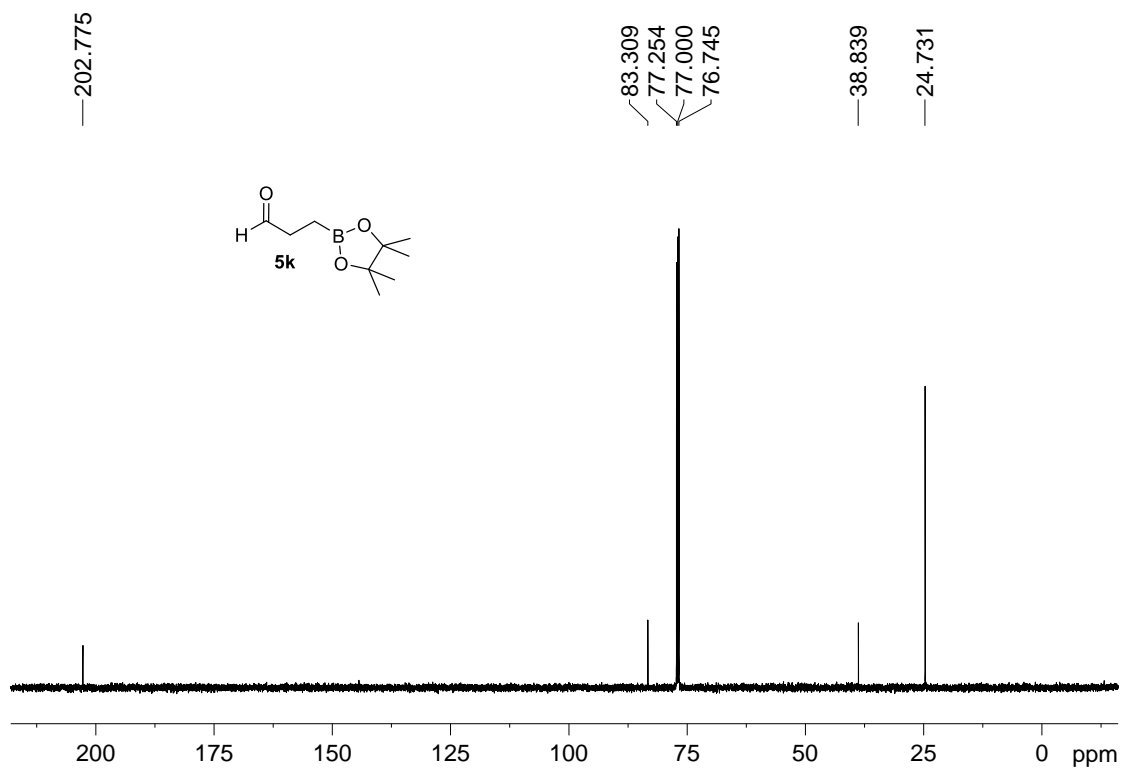

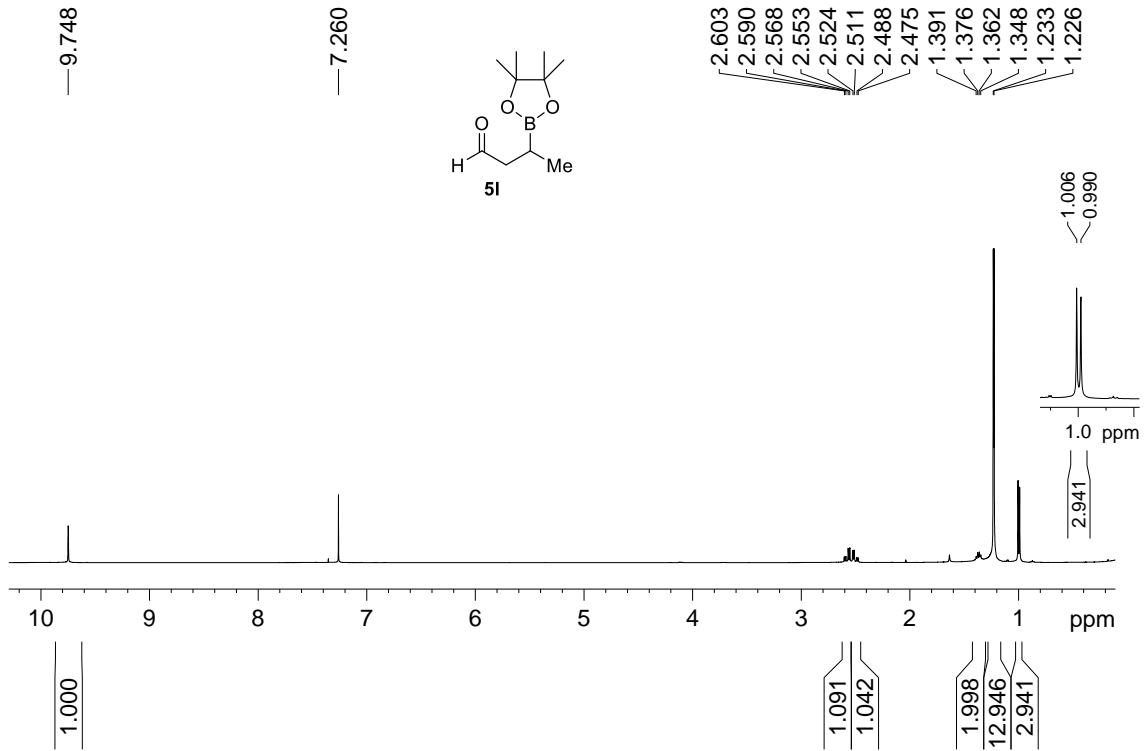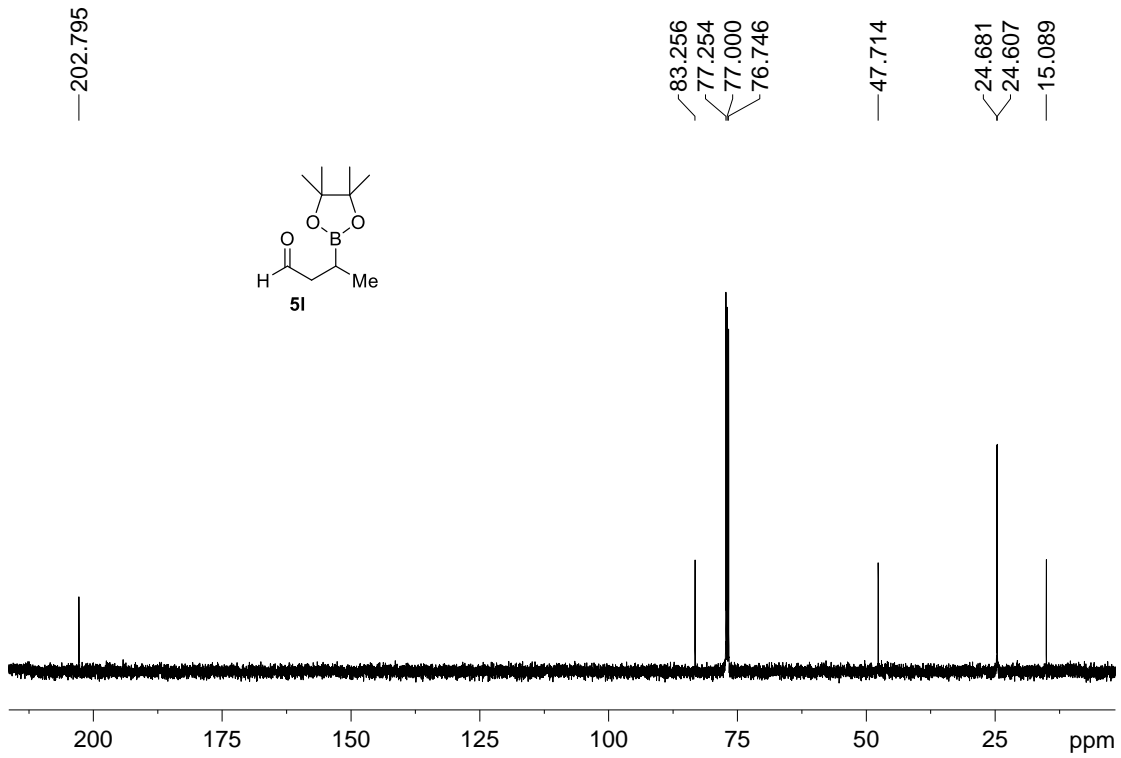

The  $^1\text{H}$  NMR below was recorded in benzene- $d_6$  which was the solvent of the reaction between excess of crotonaldehyde and  $\text{PhMe}_2\text{Si-Bpin}$  and shows the olefinic protons Ha and Hb of product **3I** having a  $^3J_{\text{HH}} = 6.0$  Hz, indicative of a cis-configuration.

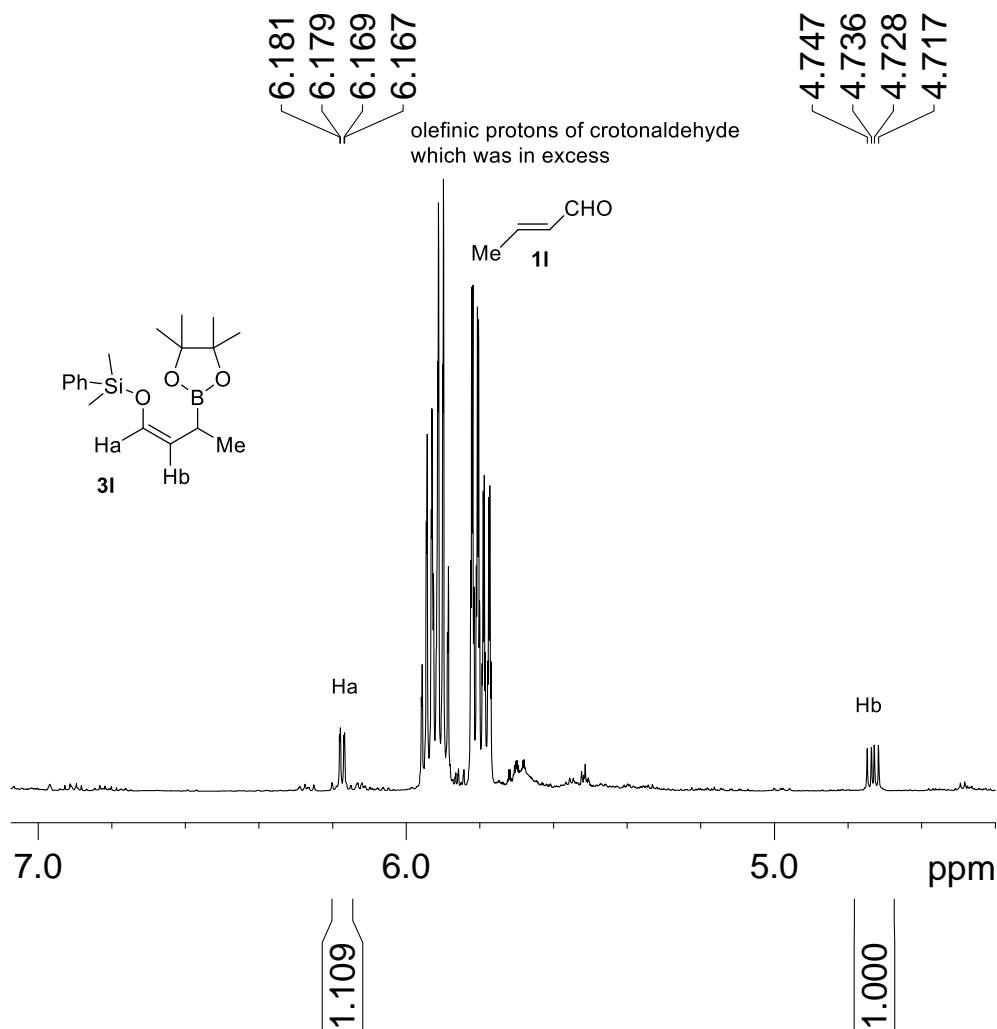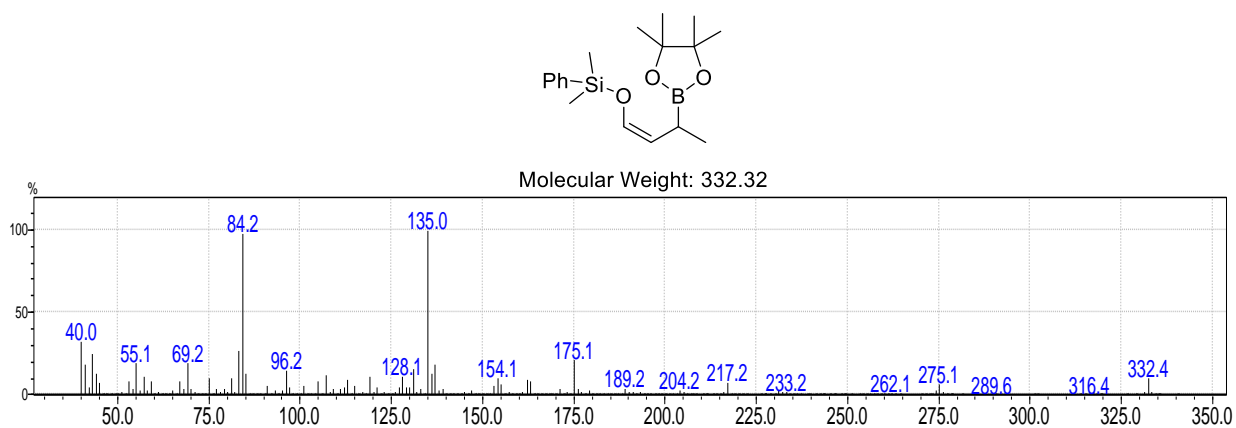

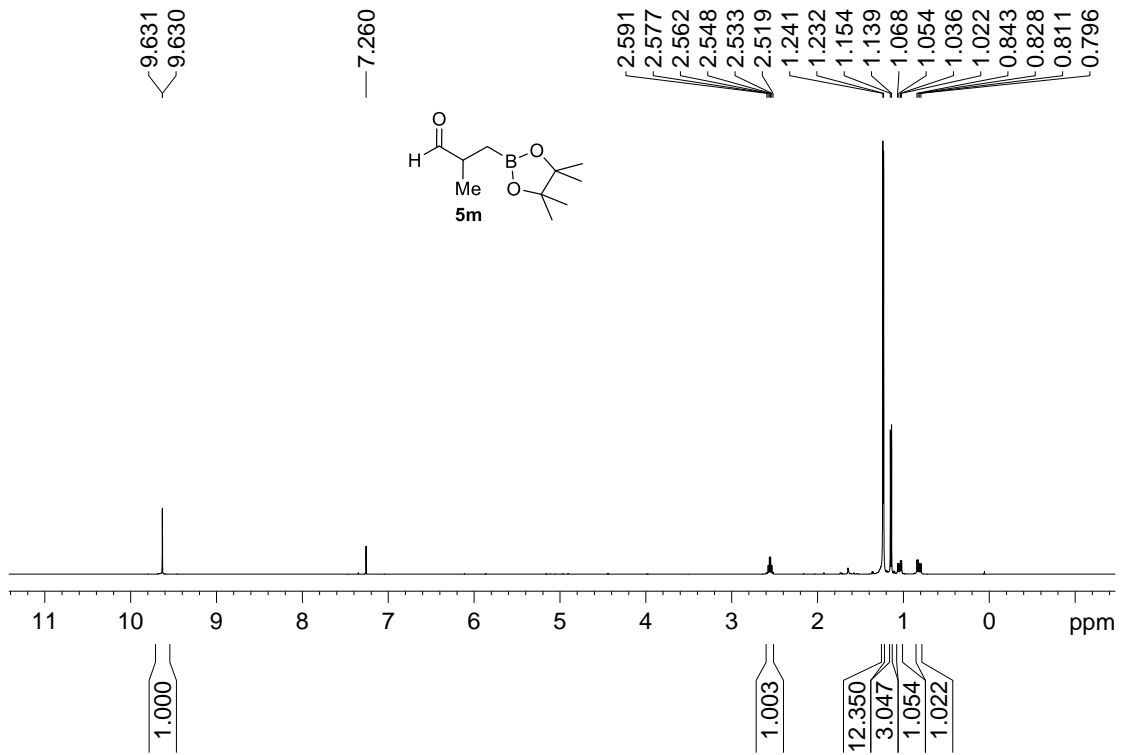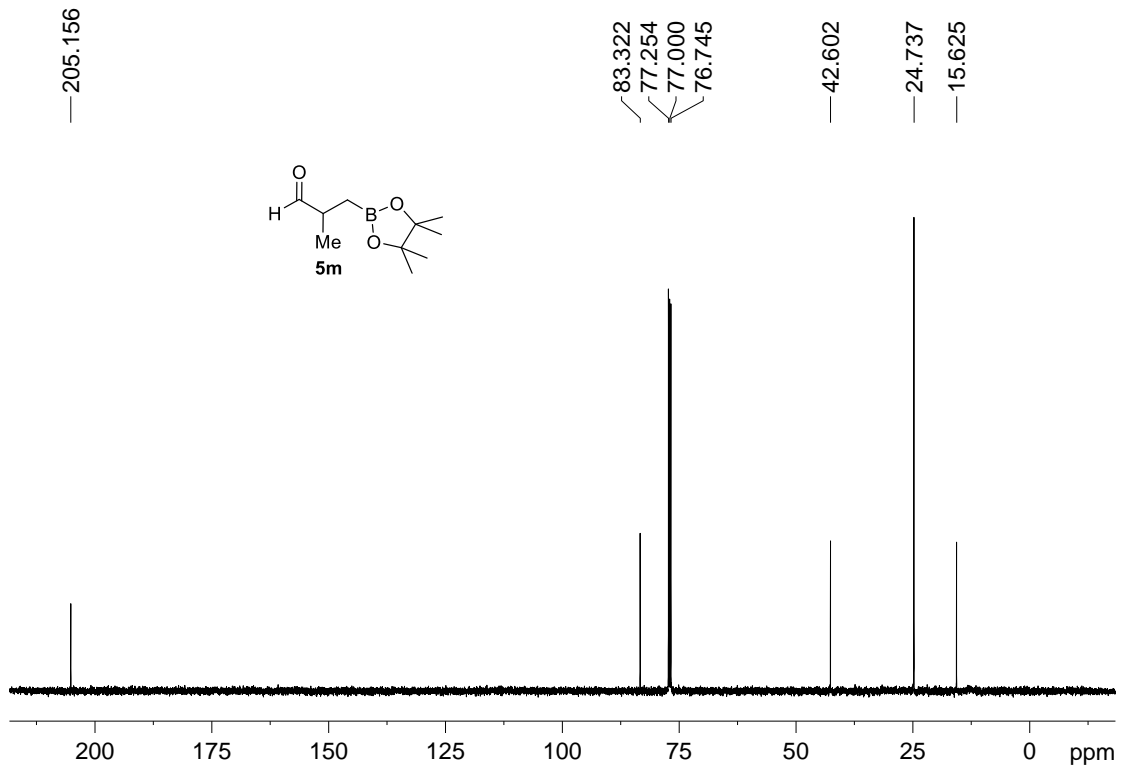

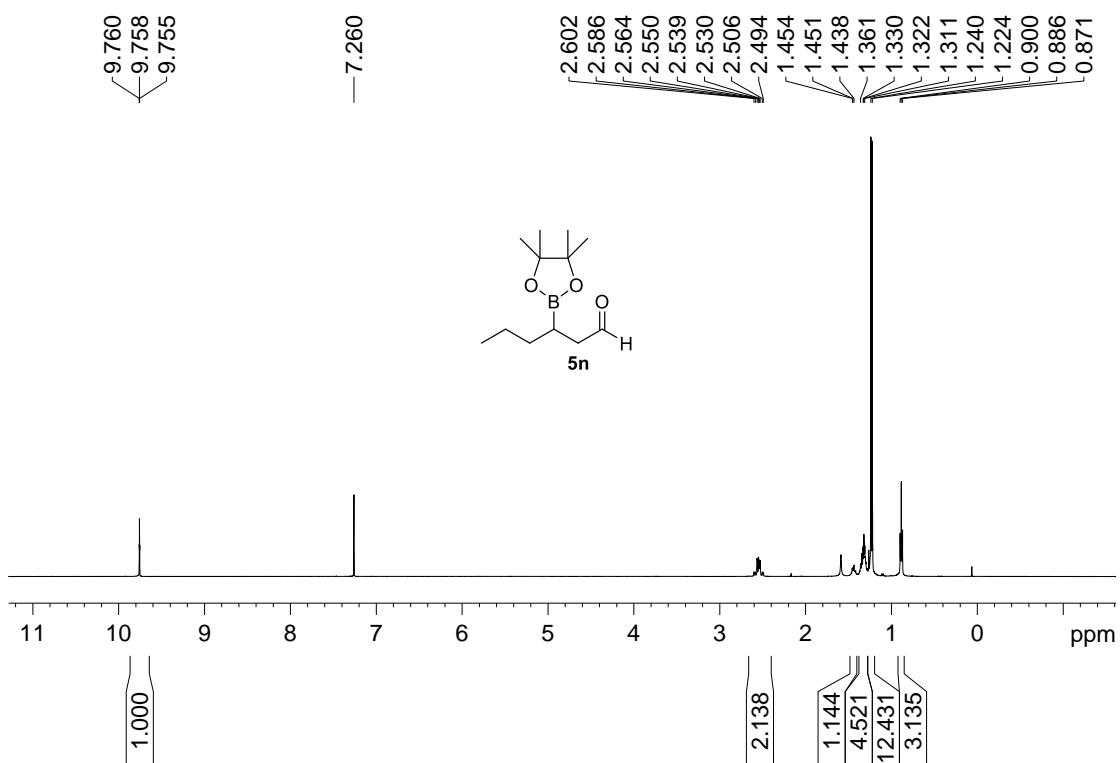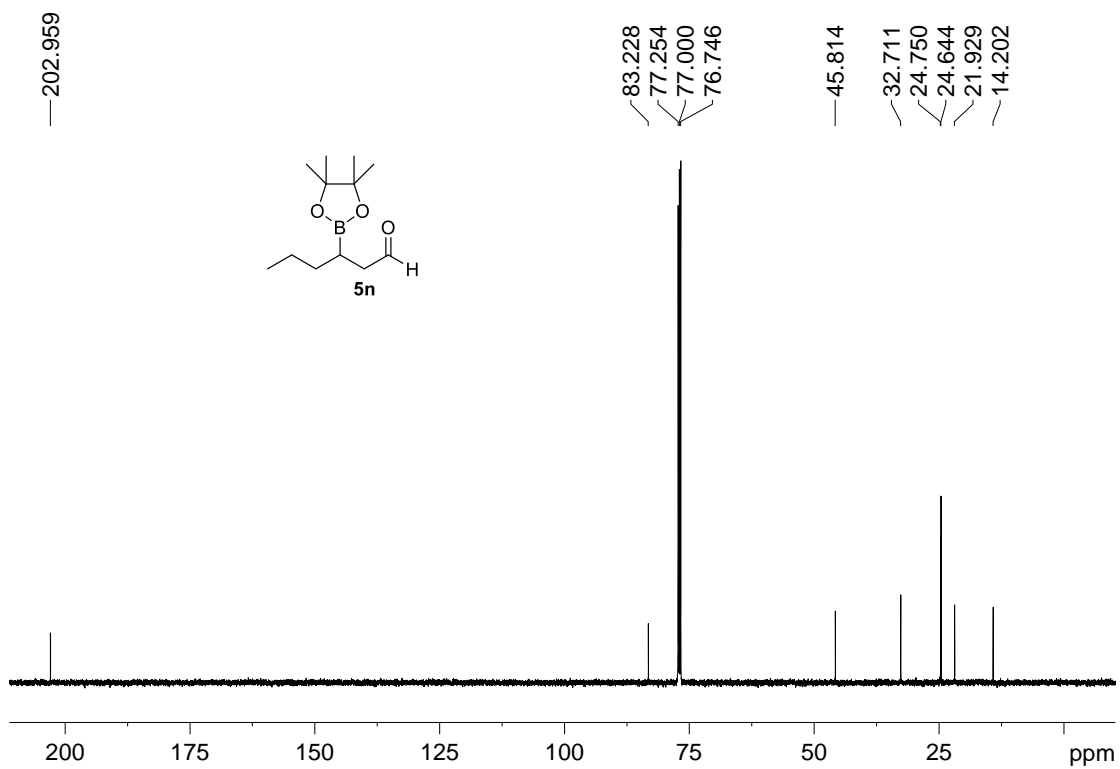

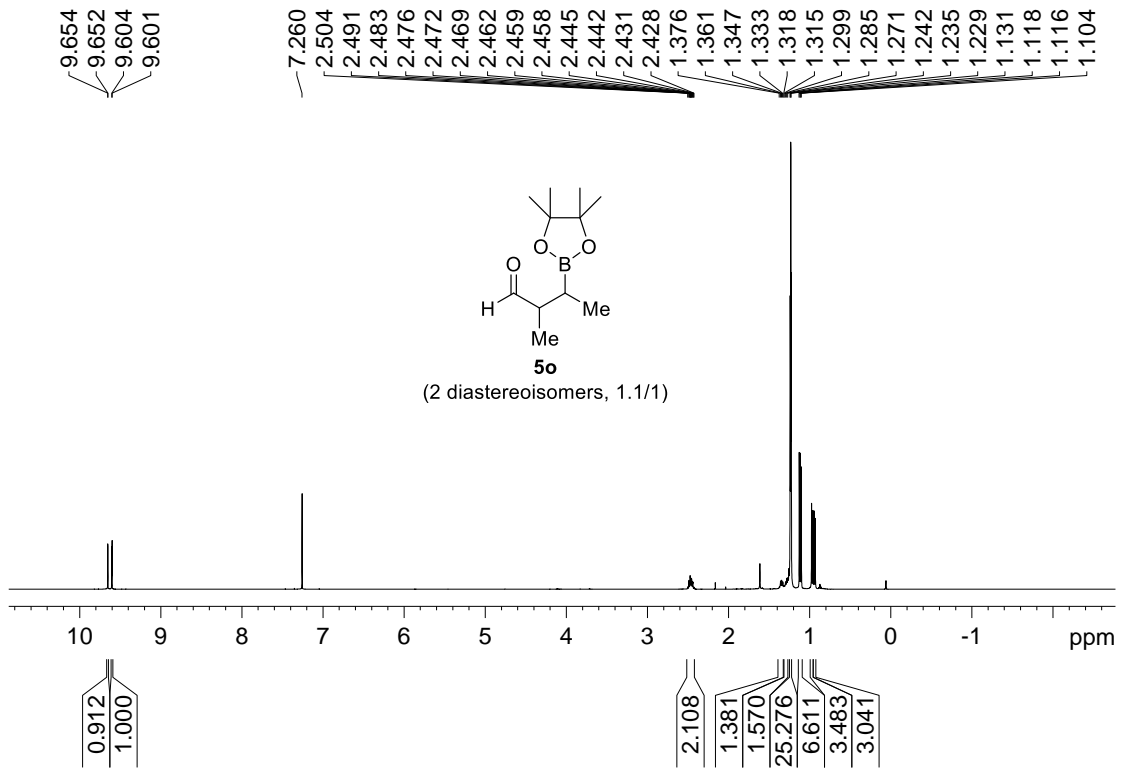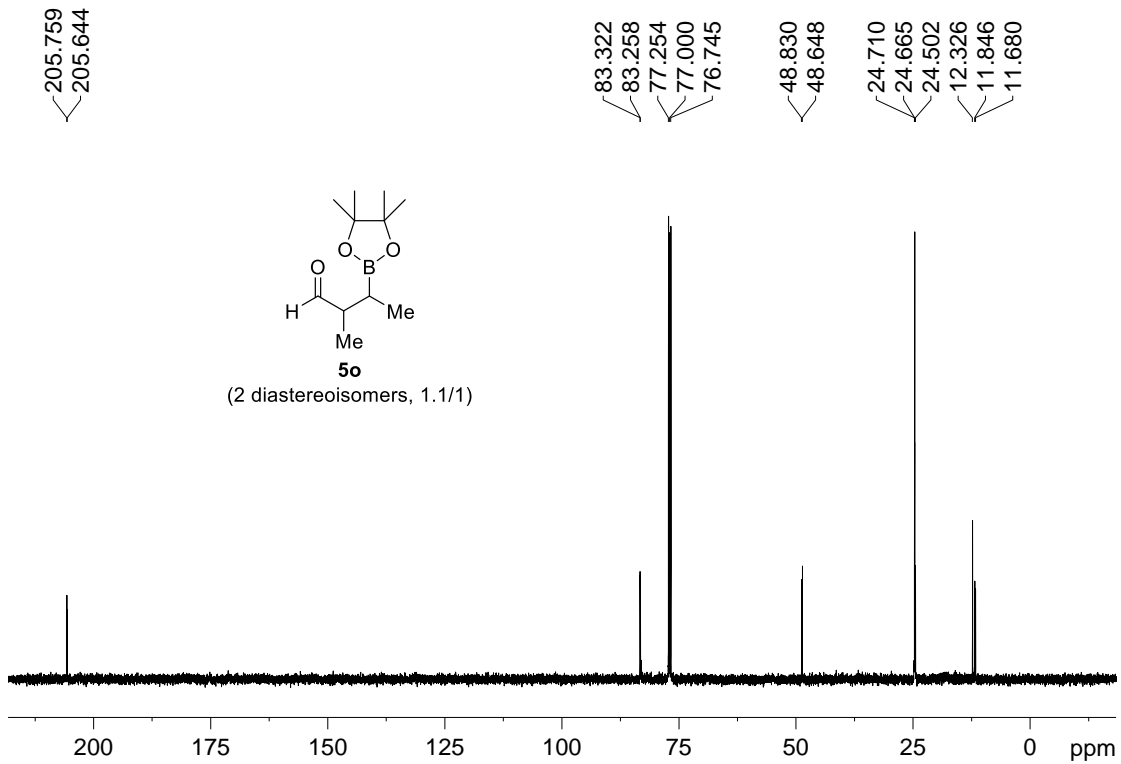

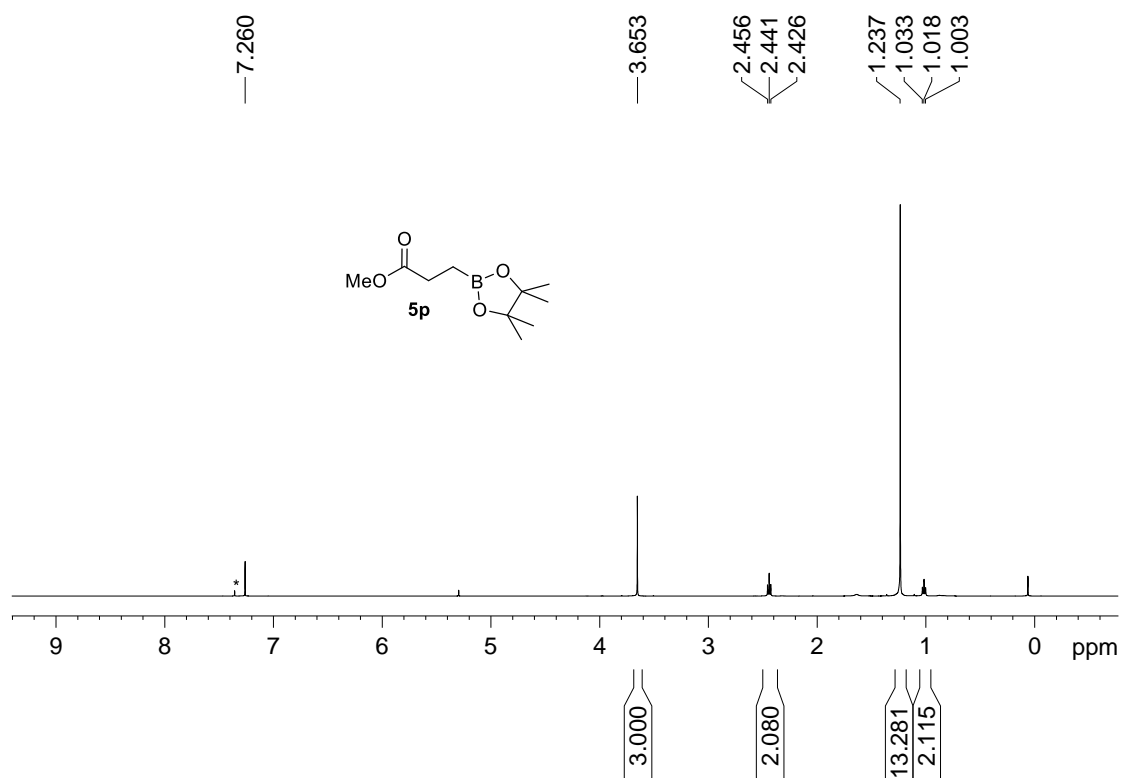

\*benzene

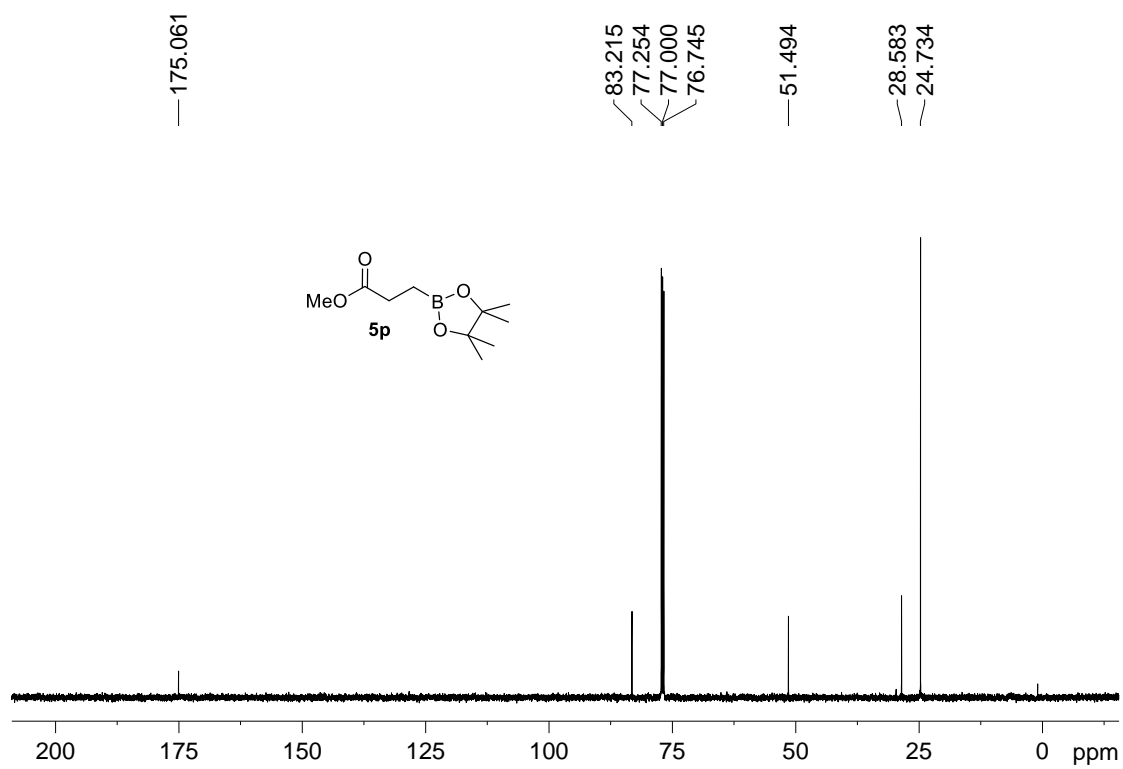

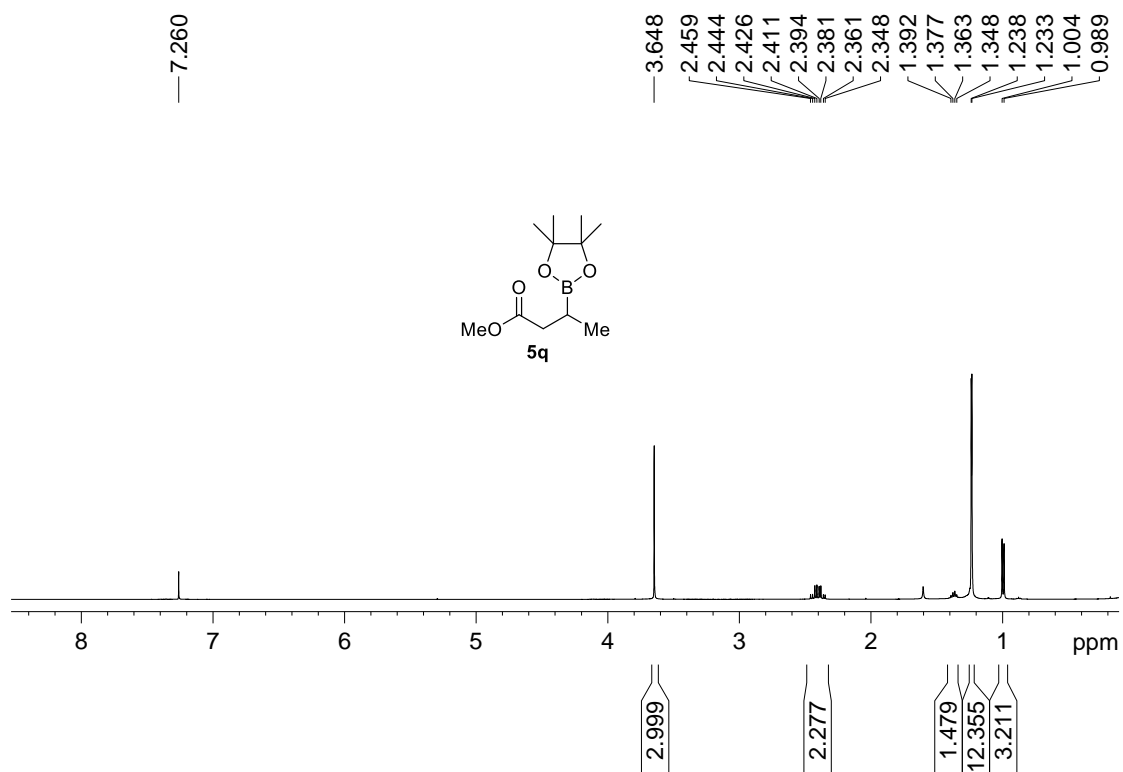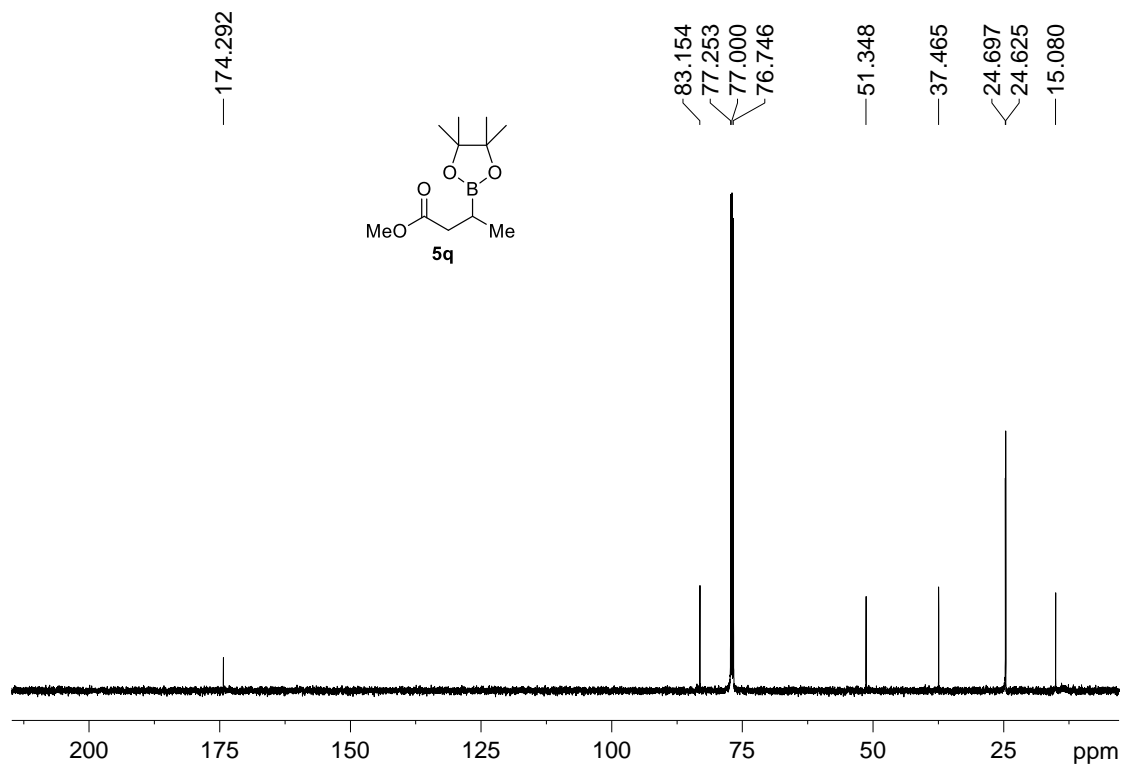



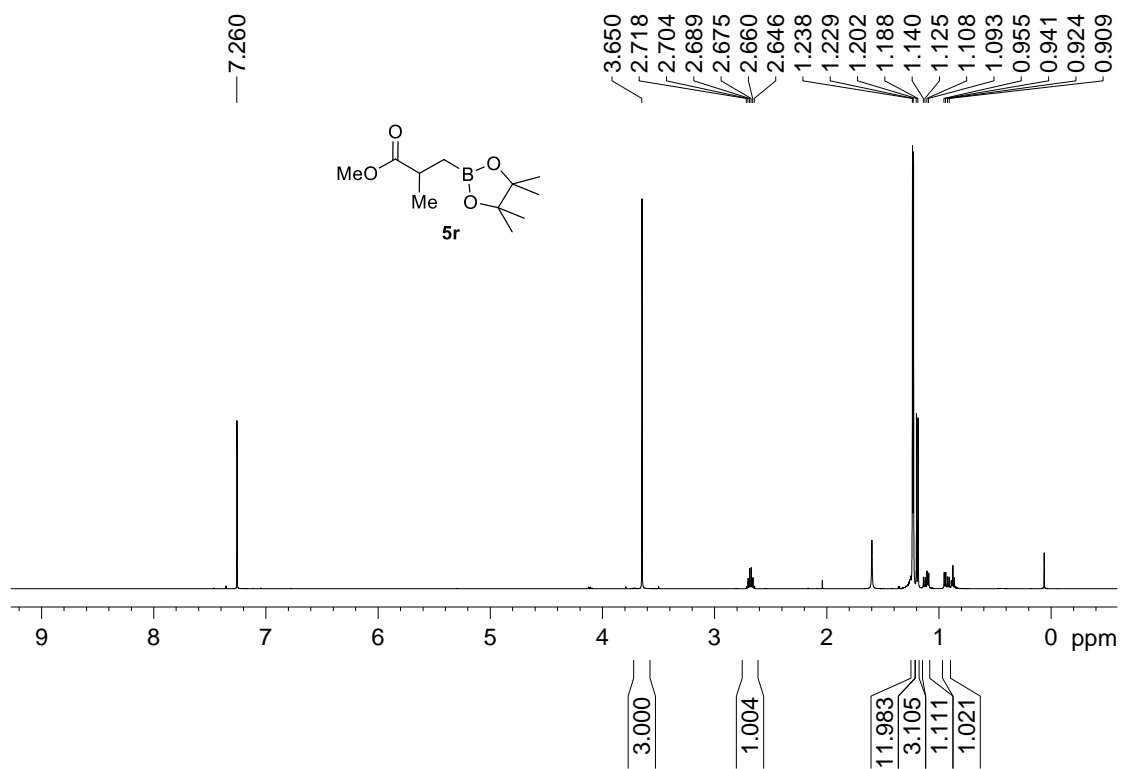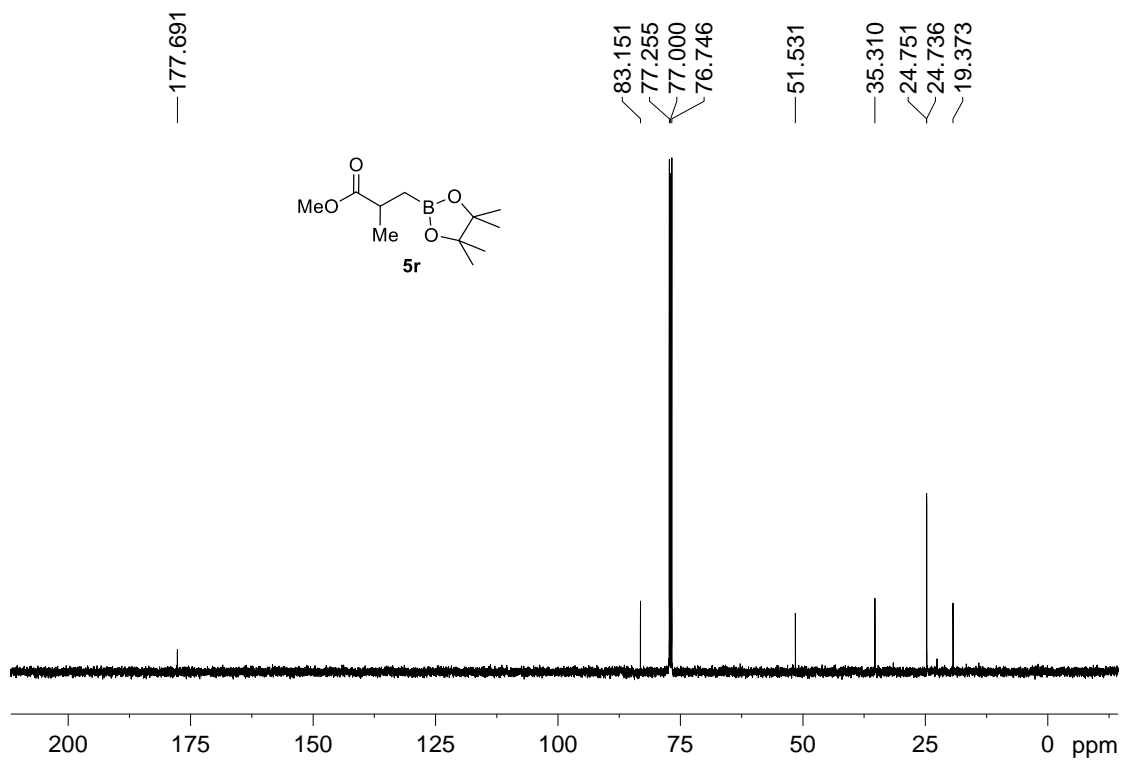

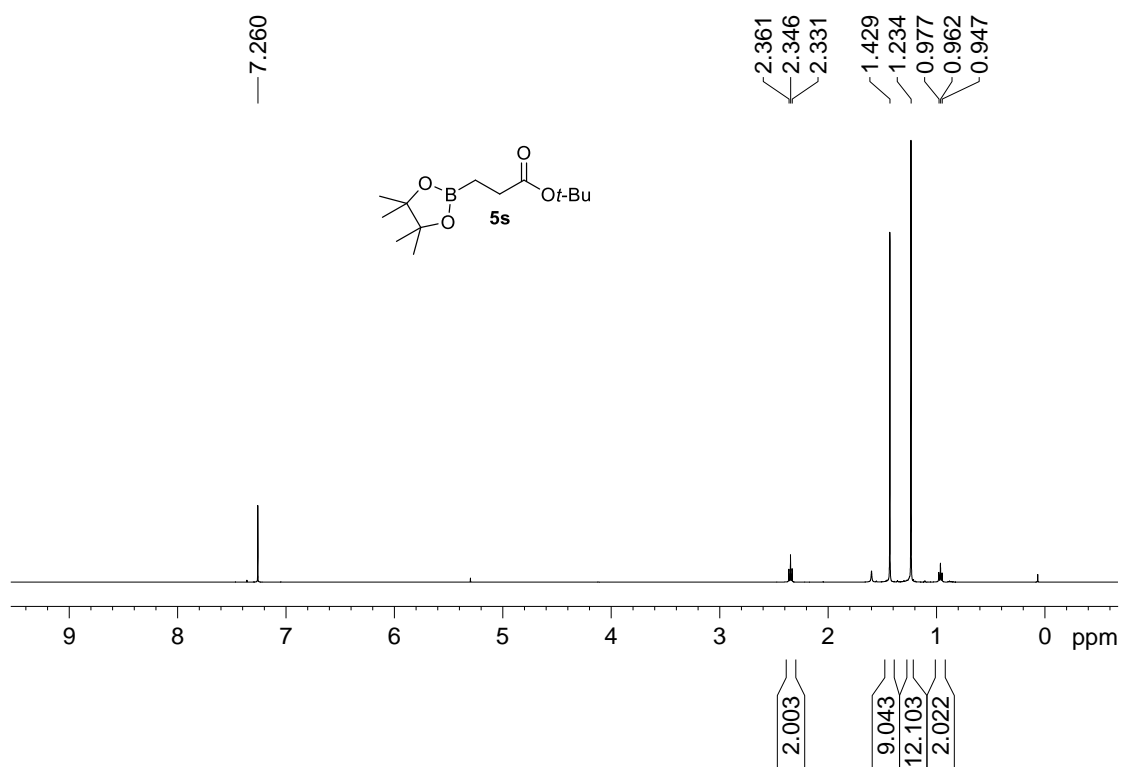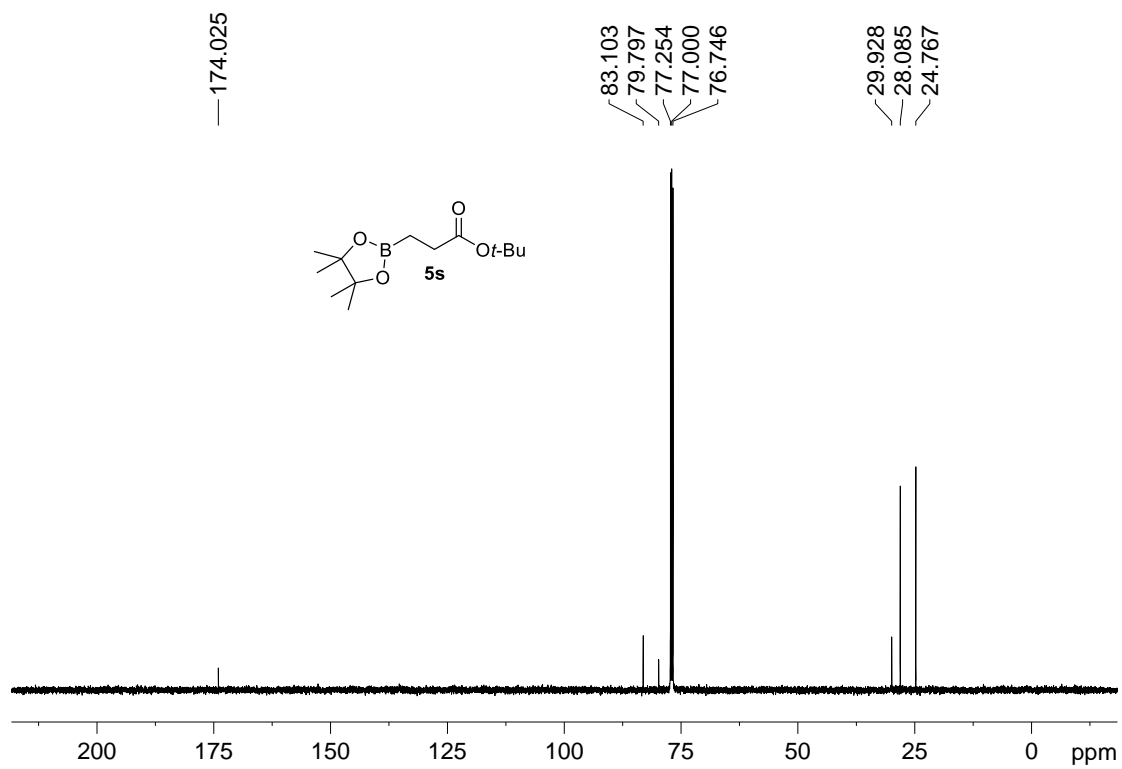

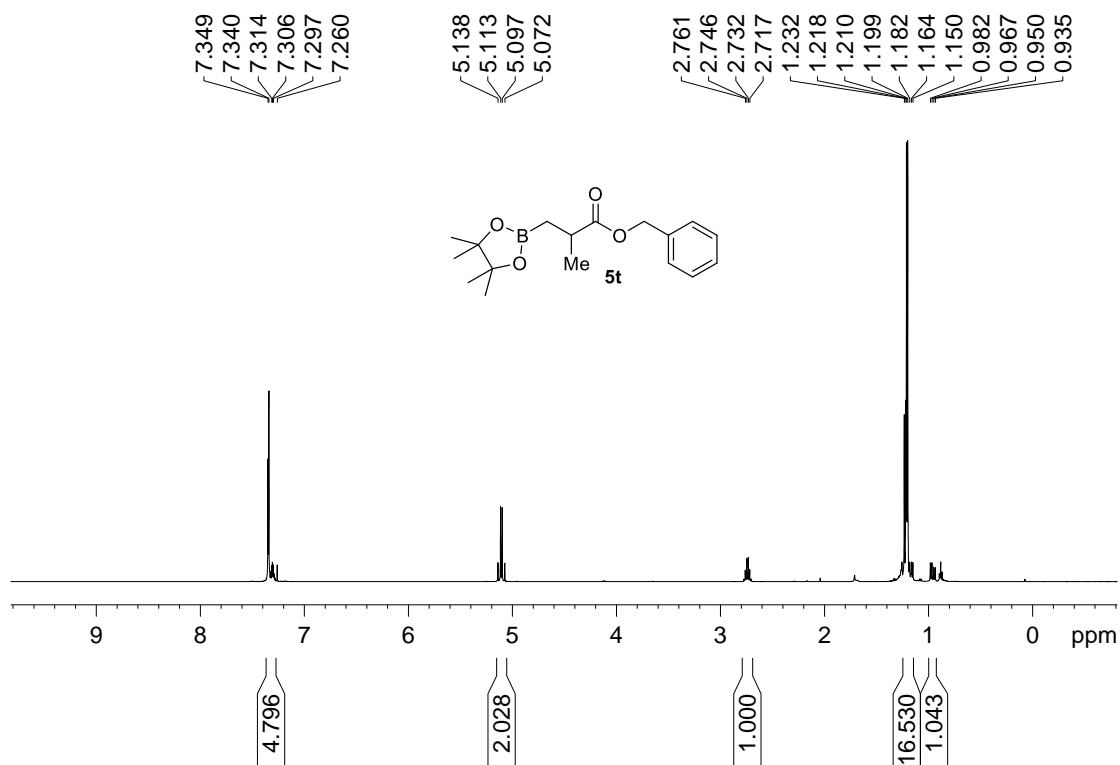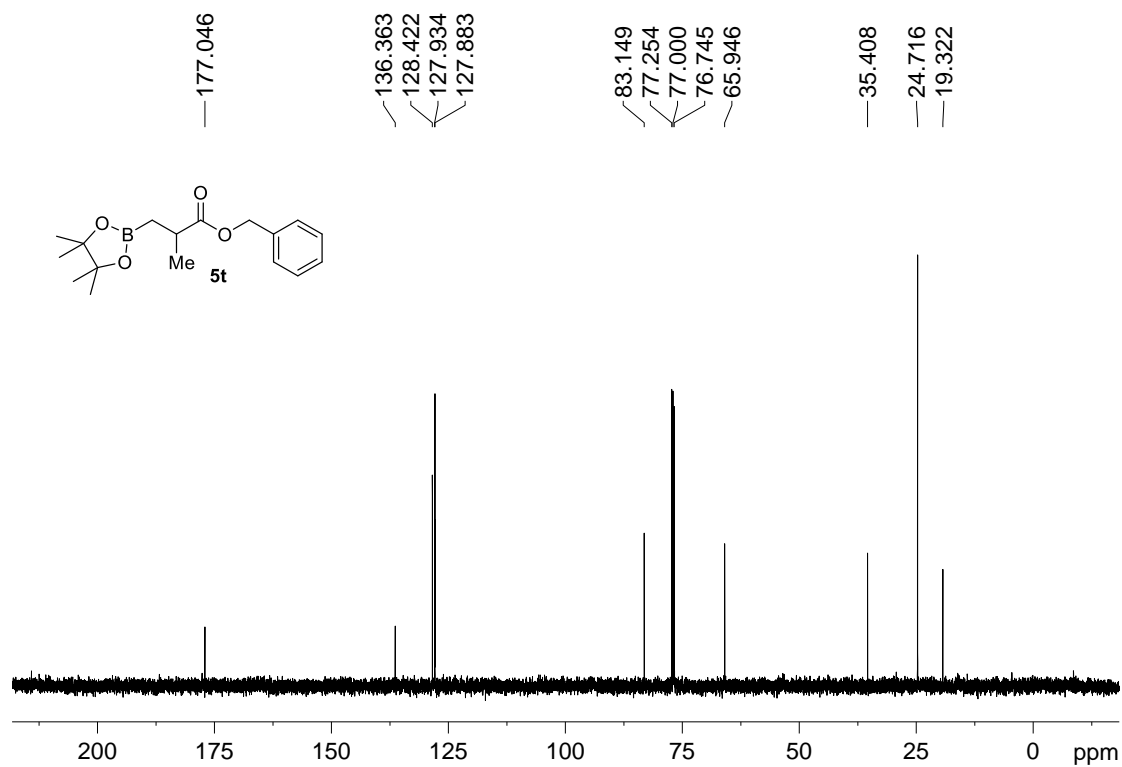

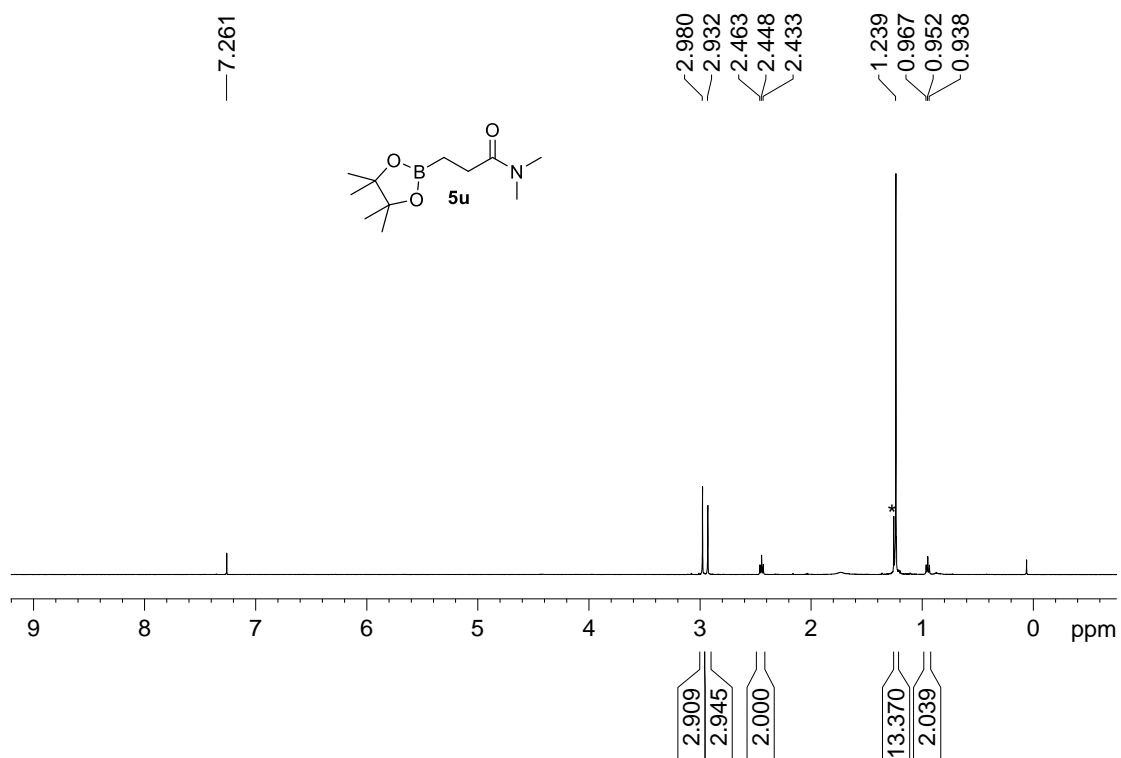

\*pinBOBpin

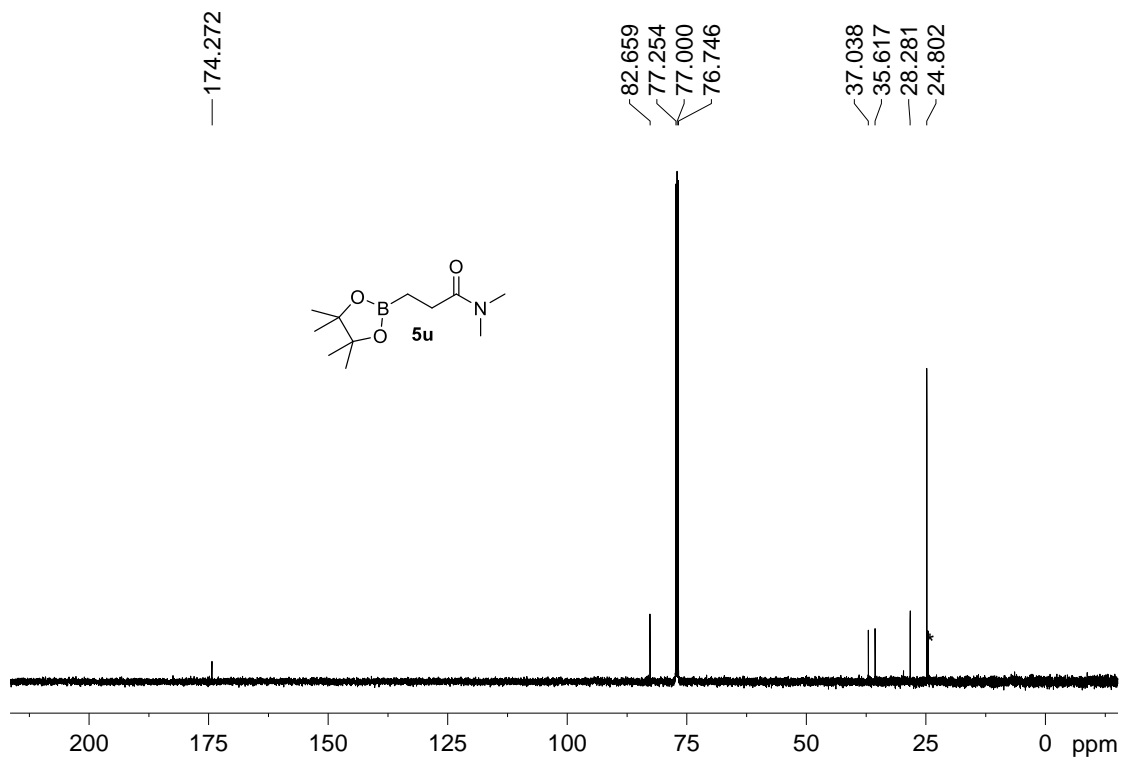

\*pinBOBpin
